# **Aging Boosts Antiviral CD8<sup>+</sup>T Cell Memory Through Improved Engagement Of Diversified Recall Response Determinants**

Bennett Davenport<sup>1-5</sup>, Jens Eberlein<sup>1,2</sup>, Tom T. Nguyen<sup>1,2</sup>, Francisco Victorino<sup>1-3</sup>, Kevin Jhun<sup>4,5</sup>, Haedar Abuirqeba<sup>4,5</sup>, Verena van der Heide<sup>4,5</sup>, Peter Heeger<sup>5</sup> and Dirk Homann<sup>1-5</sup>

<sup>1</sup>*Department of Anesthesiology & <sup>2</sup>Barbara Davis Center for Childhood Diabetes, University of Colorado Denver, Aurora, CO;*

<sup>3</sup>*Integrated Department of Immunology, University of Colorado Denver and National Jewish Health, Denver CO*

<sup>4</sup>*Diabetes Obesity Metabolism Institute & <sup>5</sup>Immunology Institute, Icahn School of Medicine at Mount Sinai, New York, NY*

## **Correspondence:**

Dirk Homann, MD  
Diabetes Obesity Metabolism & Precision Immunology Institutes  
Mount Sinai School of Medicine  
One Gustave L. Levy Place - Box 1152  
New York, NY 10029

ph: 212 241-1935  
fax: 212 241-2485  
email: [dirk.homann@mssm.edu](mailto:dirk.homann@mssm.edu)

Running Title: Determinants for Improved CD8<sup>+</sup>T cell Recall Activity

## ABSTRACT

The determinants of protective CD8<sup>+</sup> memory T cell (CD8<sup>+</sup>T<sub>M</sub>) immunity remain incompletely defined and may in fact constitute an evolving agency as aging CD8<sup>+</sup>T<sub>M</sub> progressively acquire enhanced rather than impaired recall capacities. Here, we show that old as compared to young antiviral CD8<sup>+</sup>T<sub>M</sub> more effectively harness disparate molecular processes (cytokine signaling, trafficking, effector functions, and co-stimulation/inhibition) that in concert confer greater secondary reactivity. The relative reliance on these pathways is contingent on the nature of the secondary challenge (greater for chronic than acute viral infections) and over time, aging CD8<sup>+</sup>T<sub>M</sub> re-establish a dependence on the same accessory signals required for effective priming of naïve CD8<sup>+</sup>T cells in the first place. Thus, our findings are consistent with the recently proposed “rebound model” that stipulates a gradual alignment of naïve and CD8<sup>+</sup>T<sub>M</sub> properties, and identify a diversified collection of potential targets that may be exploited for the therapeutic modulation of CD8<sup>+</sup>T<sub>M</sub> immunity.

## ABBREVIATIONS

|                                                       |                                                                                      |
|-------------------------------------------------------|--------------------------------------------------------------------------------------|
| AICD:                                                 | activation-induced cell death                                                        |
| AT:                                                   | adoptive transfer                                                                    |
| AT/RC:                                                | adoptive transfer/re-challenge                                                       |
| AT/RC Arm:                                            | adoptive transfer/re-challenge with LCMV Armstrong                                   |
| AT/RC cl13:                                           | adoptive transfer/re-challenge with LCMV cl13                                        |
| BMP:                                                  | bone morphogenetic protein                                                           |
| CTL:                                                  | cytotoxic T lymphocyte                                                               |
| GFP:                                                  | green-fluorescent protein                                                            |
| GP, NP:                                               | glycoprotein, nucleoprotein                                                          |
| GSEA:                                                 | gene set enrichment analysis                                                         |
| I <sup>o</sup> , II <sup>o</sup> , III <sup>o</sup> : | primary, secondary, tertiary                                                         |
| KEGG:                                                 | Kyoto Encyclopedia of Genes and Genomes                                              |
| LCMV:                                                 | lymphocytic choriomeningitis virus                                                   |
| LCMV Arm:                                             | LCMV Armstrong (clone 53b)                                                           |
| LCMV cl13:                                            | LCMV clone 13                                                                        |
| LM:                                                   | <i>Listeria monocytogenes</i>                                                        |
| LN:                                                   | lymph node                                                                           |
| O, Y:                                                 | old, young                                                                           |
| p14 (TCRtg):                                          | TCRtg CD8 <sup>+</sup> T cells specific for the LCMV-GP <sub>33-41</sub> determinant |
| PBMC:                                                 | peripheral blood mononuclear cells                                                   |
| pfu:                                                  | plaque forming units                                                                 |
| SAP:                                                  | SLAM-associated protein                                                              |
| SLAMF:                                                | signaling lymphocyte activation molecule family                                      |
| STAT, pSTAT:                                          | signal transducer and activator of transcription, phosphorylated STAT                |
| T cell subsets                                        |                                                                                      |
| T <sub>E</sub> :                                      | effector T cells                                                                     |
| T <sub>EM</sub> :                                     | effector memory T cells (CD62L <sup>lo</sup> /CCR7 <sup>-</sup> )                    |
| T <sub>CM</sub> :                                     | central memory T cells (CD62L <sup>hi</sup> /CCR7 <sup>+</sup> )                     |
| T <sub>M</sub> :                                      | memory T cells                                                                       |
| T <sub>MP</sub> :                                     | memory-phenotype T cells (CD44 <sup>hi</sup> )                                       |
| T <sub>N</sub> :                                      | naïve T cells (CD44 <sup>lo</sup> )                                                  |
| T <sub>REG</sub> :                                    | regulatory T cells                                                                   |
| TCRtg:                                                | T cell receptor transgenic                                                           |
| TSLP:                                                 | Thymic stromal lymphopoietin                                                         |

## INTRODUCTION

What does it take for pathogen-specific CD8<sup>+</sup> memory T cells (CD8<sup>+</sup>T<sub>M</sub>) to mount an efficient and protective recall response? In most general terms, the efficacy of a secondary (II<sup>o</sup>) CD8<sup>+</sup> effector T cell (CD8<sup>+</sup>T<sub>E</sub>) response is contingent on the numbers of available CD8<sup>+</sup>T<sub>M</sub>, their differentiation status and anatomical distribution, the contribution of other immune cell populations (e.g., CD4<sup>+</sup>T cells, B cells, innate immune cells), and the precise conditions of pathogen re-encounter, *i.e.* the nature of the pathogen as well as the route and dosage of infection. Thus, the specific constraints of experimental or naturally occurring pathogen exposure will dictate relevant outcomes that are predictable only in as much as the relative contribution of individual biological parameters are sufficiently understood, a task much complicated by the considerable combinatorial possibilities that ultimately shape the balance of pathogen replication and control, pathogen-induced damage, immunopathology, tissue protection and repair. Simply put, CD8<sup>+</sup>T<sub>M</sub>-mediated immune protection is eminently context-dependent.

The difficulties associated with attempts to define more generally applicable rules for the phenomenon of protective CD8<sup>+</sup>T<sub>M</sub> immunity are perhaps best illustrated by the “effector/central memory T cell” paradigm (T<sub>EM</sub> and T<sub>CM</sub>, respectively) that constitutes one of the most widely employed and consequential distinctions in the field of memory T cell research [1]. The analytical and physical separation according to CD62L (and CCR7) expression status has spawned an extraordinary amount of work that has assigned numerous distinctive, and at times seemingly contradictory, properties to CD62L<sup>lo</sup> CD8<sup>+</sup>T<sub>EM</sub> and CD62L<sup>hi</sup> CD8<sup>+</sup>T<sub>CM</sub> subsets [2-4]. The CD8<sup>+</sup>T<sub>M</sub> populations thus defined, however, are very much a moving target. For example, CD62L expression by peripheral CD8<sup>+</sup>T<sub>M</sub> generated in response to an acute pathogen challenge is progressively enhanced as a function of original priming conditions and infection history; upon entry into certain lymphoid or nonlymphoid tissues, CD8<sup>+</sup>T<sub>M</sub>-expressed CD62L is reduced; and CD8<sup>+</sup>T<sub>EM</sub> and T<sub>CM</sub> subsets themselves are subject to a gradual adaptation that introduces an array of molecular, phenotypic and functional changes including, importantly, an increase of their respective recall capacities [2, 5-10]. Most recently, D. Busch’s group used an elegant serial adoptive transfer system in which single I<sup>o</sup>, II<sup>o</sup> or III<sup>o</sup> *L. monocytogenes*- (LM-) specific CD8<sup>+</sup>T<sub>CM</sub> (*i.e.*, CD8<sup>+</sup>T<sub>CM</sub> established after a I<sup>o</sup>, II<sup>o</sup> or III<sup>o</sup> LM challenge) gave rise to recall responses of comparable size, phenotypic and functional diversity, and protective capacity [11, 12]. Since single CD8<sup>+</sup>T<sub>EM</sub> failed to mount a similar response, these studies provide definitive proof that the CD62L<sup>hi</sup> CD8<sup>+</sup>T<sub>CM</sub> subset harbors greater recall potential [11, 12] yet CD62L itself is apparently dispensable for an effective LM-specific recall response [13]. In some other model systems, enhanced protection was even afforded by CD8<sup>+</sup>T<sub>EM</sub>, their limited proliferative potential notwithstanding [2-4]. It is therefore imperative to define, beyond the T<sub>EM</sub>/T<sub>CM</sub> paradigm, which exact mechanisms contribute to the regulation of effective CD8<sup>+</sup>T<sub>M</sub> recall activity under varied experimental conditions, and to what extent specific molecular pathways may become a dominant force in a given model system. A synthesis of such efforts may then provide a foundation for the formulation of more general rules of CD8<sup>+</sup>T<sub>M</sub> engagement.

In the present work, we took advantage of our observation that aging CD8<sup>+</sup>T<sub>M</sub> specific for lymphocytic choriomeningitis virus (LCMV) gradually acquire unique molecular, phenotypic and functional signatures that are associated with a capacity for more vigorous IL<sup>0</sup> CD8<sup>+</sup>T<sub>E</sub> responses and improved immune protection [9]. We have further organized these dynamic changes in the “rebound model” of extended CD8<sup>+</sup>T<sub>M</sub> maturation according to which pertinent properties of aging CD8<sup>+</sup>T<sub>M</sub> are progressively aligned, perhaps surprisingly, with those of naïve CD8<sup>+</sup>T<sub>N</sub> populations [9, 10]. Here, by focusing on a diverse set of co-stimulatory and inhibitory, cytokine, chemokine and homing receptors/ligands differentially expressed by old and young CD8<sup>+</sup>T<sub>M</sub> as well as their distinct effector function profiles [9], we identified a broad array of mechanisms that “tune” CD8<sup>+</sup>T<sub>M</sub> recall reactivity to an acute and/or chronic viral re-challenge, and that specifically support the greater IL<sup>0</sup> CD8<sup>+</sup>T<sub>E</sub> expansions of aged CD8<sup>+</sup>T<sub>M</sub> populations. In particular, we propose that aging CD8<sup>+</sup>T<sub>M</sub> re-acquire a dependence on multiple accessory pathways for optimization of their IL<sup>0</sup> CD8<sup>+</sup>T<sub>E</sub> reactivity that were essential for the effective and efficient priming of naïve CD8<sup>+</sup>T<sub>N</sub> in the first place.

## RESULTS

### ***Interrogating CD8<sup>+</sup>T<sub>M</sub> recall responses: the mixed adoptive transfer/re-challenge (AT/RC) system.***

To identify the mechanisms regulating the differential recall reactivity of young and old antiviral CD8<sup>+</sup>T<sub>M</sub>, we employed a mixed “adoptive transfer/re-challenge” (AT/RC) system described in ref.[9]. In brief, cohorts of young adult mice congenic at the CD45 or CD90 locus were challenged with LCMV (2x10<sup>5</sup> pfu LCMV Armstrong [Arm] i.p.) and allowed to establish LCMV-specific CD8<sup>+</sup>T cell memory. By performing viral infections in a staggered fashion, we generated groups of young (~2 months after challenge) and aged (>15 months after infection) LCMV-immune mice that served as donors for a concurrent interrogation of young and old CD8<sup>+</sup>T cell memory. To this end, CD8<sup>+</sup>T<sub>M</sub> populations were enriched from the congenic donors, combined at a ratio of 1:1 at the level of CD8<sup>+</sup>T<sub>M</sub> specific for the immunodominant LCMV nucleoprotein (NP) determinant NP<sub>396-404</sub> (D<sup>b</sup>NP<sub>396</sub><sup>+</sup>CD8<sup>+</sup>T<sub>M</sub>), and injected into congenic recipients that were subsequently inoculated with LCMV; the respective expansions of young vs. old D<sup>b</sup>NP<sub>396</sub><sup>+</sup>CD8<sup>+</sup>T<sub>M</sub>-derived I<sup>o</sup> CD8<sup>+</sup>T<sub>E</sub> populations were then quantified eight days later (**Fig.1A**).

As detailed in ref.[9], the mixed AT/RC model offers several practical advantages that facilitate the elucidation of molecular mechanisms in control of differential CD8<sup>+</sup>T<sub>M</sub> recall capacities. 1., young and old I<sup>o</sup> CD8<sup>+</sup>T<sub>E</sub> responses develop in the same host and are therefore subject to the same general perturbations provoked by various experimental interventions. 2., the magnitude of recall responses elaborated by transferred CD8<sup>+</sup>T<sub>M</sub> populations is primarily shaped by a complex of T cell-intrinsic properties and, importantly, is largely independent of host age. 3., the relative extent of I<sup>o</sup> CD8<sup>+</sup>T<sub>E</sub> expansions (but not the functional profiles of I<sup>o</sup> CD8<sup>+</sup>T<sub>E</sub>) can serve as a correlate for immune protection. 4., the AT of low CD8<sup>+</sup>T<sub>M</sub> numbers permits their maximal *in vivo* activation without preventing the generation of concurrent I<sup>o</sup> CD8<sup>+</sup>T<sub>E</sub> responses; accordingly, the system can monitor the relatively independent evolution of three CD8<sup>+</sup>T<sub>E</sub> populations targeting the same viral epitope (I<sup>o</sup>, young I<sup>o</sup> and old I<sup>o</sup> D<sup>b</sup>NP<sub>396</sub><sup>+</sup>CD8<sup>+</sup>T<sub>E</sub>; **Fig.1A**). 5., the use of two different re-challenge protocols may differentiate between basic determinants required for CD8<sup>+</sup>T<sub>M</sub> recall responses in the wake of an “acute” LCMV Arm infection (AT/RC Arm) and a more complex constellation of mechanisms supporting the effective coordination I<sup>o</sup> CD8<sup>+</sup>T<sub>E</sub> expansions after a “chronic” LCMV clone 13 infection (AT/RC cl13) (**Fig.1A**). Altogether, we deployed the mixed AT/RC approach to ascertain the contribution of particular molecular pathways to the divergent I<sup>o</sup> expansion of young and old CD8<sup>+</sup>T<sub>M</sub> by treatment of recipients with blocking antibodies or use of immunodeficient hosts (**Fig.1A**); while the systemic nature of these interventions cannot discern between direct and indirect effects exerted on CD8<sup>+</sup>T cell populations, the broad utility and practical relevance of our approach lies in the relative ease with which CD8<sup>+</sup>T<sub>E</sub> cell responses can be reliably manipulated. Lastly, for facilitated manipulation of CD8<sup>+</sup>T<sub>M</sub> we employed the “p14 chimera” model in which purified naïve and congenic p14 T<sub>N</sub> (TCRtg CD8<sup>+</sup>T cells specific for LCMV glycoprotein GP<sub>33-41</sub>) are transferred into B6 recipients that are subsequently challenged with LCMV Arm to generate young and old p14 T<sub>M</sub> [9] (since p14 T<sub>M</sub> are a clonotypic population, p14 chimeras also effectively control for TCR affinity/avidity as a potentially confounding variable).

## ***No role for IL-7 and IL-15 in the differential regulation of young and old $II^0$ CD8<sup>+</sup>T<sub>E</sub> expansions.***

The cytokines IL-7 and IL-15 are essential for the preservation of CD8<sup>+</sup>T cell memory as they support homeostatic proliferation and survival of CD8<sup>+</sup>T<sub>M</sub> [14]. Accordingly, the pronounced upregulation of IL-7 and IL-15 receptor components (CD127/IL-7Ra and CD122/IL-2Rb) by aging CD8<sup>+</sup>T<sub>M</sub> suggested their increasing responsiveness to IL-7 and IL-15 (ref.[9] and **Fig.S1** which stratifies an enrichment of JAK-STAT pathway genes in old p14 T<sub>M</sub>). Although this is indeed the case (determined at the level of cytokine-induced STAT5 phosphorylation), homeostatic proliferation rates of antiviral CD8<sup>+</sup>T<sub>M</sub> remained surprisingly unaffected by age [10]. Nevertheless, enhanced CD8<sup>+</sup>T<sub>M</sub> expression of CD127 and CD122 could still contribute to improved recall responses since both IL-7 and IL-15 may act as “adjuvants” to boost CD8<sup>+</sup>T<sub>E</sub> immunity [15, 16], albeit in a potentially STAT5-independent manner for  $II^0$  CD8<sup>+</sup>T<sub>E</sub> responses [17]. We therefore employed the mixed AT/RC system (**Fig.1A**) to evaluate the impact of combined IL-7/IL-7Ra blockade on the  $II^0$  reactivity of young and old CD8<sup>+</sup>T<sub>M</sub>. As shown in **Fig.1B**, both differential and overall  $II^0$  CD8<sup>+</sup>T<sub>E</sub> expansions after an “acute” LCMV Arm challenge were impervious to IL-7/IL-7Ra blockade; the data also illustrate that an analysis of different tissues (blood or spleen) and the use of different denominators ( $II^0$  CD8<sup>+</sup>T<sub>E</sub> per 10<sup>6</sup> cells or total spleen cells) provides essentially similar results (**Fig.1B**). Similarly, IL-7/IL-7Ra blockade remained without consequences in additional mixed AT/RC experiments using the “chronic” LCMV cl13 model (**Fig.1C**). Our results further exclude a relevant contribution of thymic stromal lymphopoietin (TSLP) to  $II^0$  CD8<sup>+</sup>T<sub>E</sub> expansions since the TSLP receptor (TSLPR), downregulated by aging CD8<sup>+</sup>T<sub>M</sub> (**Fig.S1** and ref.[9]), associates with CD127 for effective signal transduction [18], and the CD127-specific A7R34 antibody used in our experiments also inhibits TSLP action [19].

We also ascertained a potential role for IL-15 in our model system by conducting mixed AT/RC experiments with IL-15<sup>-/-</sup> recipients. Lack of IL-15, however, did not compromise the greater  $II^0$  reactivity of old CD8<sup>+</sup>T<sub>M</sub> (**Fig.1D**); in fact, recall responses of aged CD8<sup>+</sup>T<sub>M</sub> were somewhat increased in IL-15<sup>-/-</sup> as compared to B6 control mice (2.4-fold, p=0.01; **Fig.1D**), perhaps as a result of lymphopenia-enhanced, IL-15-independent expansions in the context of an active inflammation. We conclude that elevated CD127 and CD122 expression by aging CD8<sup>+</sup>T<sub>M</sub> does not improve their recall responses.

## ***Divergent requirements of IL-4, IL-6 and TGFβ for enhanced $II^0$ reactivity of aged CD8<sup>+</sup>T<sub>M</sub>.***

The dynamic regulation of CD127 and CD122 expression discussed above constitutes a common theme shared by multiple other CD8<sup>+</sup>T<sub>M</sub>-expressed cytokine receptors. With the notable exception of TSLPR, these receptors are all subject to increasing expression by aging CD8<sup>+</sup>T<sub>M</sub> with overall gains varying from the modest (CD126/IL-6Ra, CD130/IL-6ST, IL-21R, IFNAR1) to the more pronounced (CD124/IL-4Ra, TGFβRII, CD119/IFNγR1) (**Fig.S1** and ref.[9]). Corresponding temporal analyses extended here to blood-borne CD8<sup>+</sup>T<sub>M</sub> populations with different LCMV specificities further support the conclusion that the prolonged phenotypic CD8<sup>+</sup>T<sub>M</sub> maturation is indeed a generalized and systemic phenomenon (**Figs.2A/B & S2**). The

kinetics of CD124, CD126 and TGF $\beta$ RII expression are of particular interest since the signaling pathways downstream of these receptors emerged as distinctive traits in our earlier Ingenuity Pathway Analyses of aging CD8<sup>+</sup>T<sub>M</sub> [9], and both IL-6 and TGF $\beta$  have been suggested to exert crucial roles in the natural history of chronic LCMV infection [20, 21]. To further assess the relation between cytokine receptor expression levels and signal transduction capacity, we briefly exposed young and old p14 T<sub>M</sub> *in vitro* to IL-4 or IL-6 and quantified phosphorylation of STAT6 and STAT3, respectively. Here, aged p14 T<sub>M</sub> indeed responded with greater STAT phosphorylation, and the re-expression of CD124 by old p14 T<sub>M</sub> at levels otherwise found only on naïve CD8<sup>+</sup>T cells correlated with equal IL-4 reactivity of these populations (**Fig.2B**). The generally lower CD126 (and CD130 [9]) expression by CD8<sup>+</sup>T<sub>M</sub>, which required overall higher cytokine concentrations for effective STAT phosphorylation as compared to the IL-4 experiments, nevertheless conferred an age-dependent differential induction of pSTAT3; at the same time, IL-10-induced STAT3 phosphorylation demonstrated no differences (**Fig.2B**) in agreement with the stable low-level IL-10 receptor expression among aging CD8<sup>+</sup>T<sub>M</sub> [9].

Despite the heightened reactivity of old CD8<sup>+</sup>T<sub>M</sub> to IL-4, initial experiments performed with the mixed AT/RC Arm approach and B6 vs. IL-4<sup>-/-</sup> recipients did not reveal a role for IL-4 in the regulation of I<sup>o</sup> CD8<sup>+</sup>T<sub>E</sub> expansions (**Fig.2C**). In contrast, LCMV cl13 infection of IL-4<sup>-/-</sup> recipients resulted in an overall decrease of specific CD8<sup>+</sup>T<sub>E</sub> immunity, including a 4.0-fold reduction of the splenic I<sup>o</sup> CD8<sup>+</sup>T<sub>E</sub> response (p=0.0056). Importantly, the relative reduction of old I<sup>o</sup> CD8<sup>+</sup>T<sub>E</sub> expansions was more pronounced (3.7-fold, comparing B6 and IL-4<sup>-/-</sup> recipients) than that of respective young I<sup>o</sup> CD8<sup>+</sup>T<sub>E</sub> populations (2.6-fold) (**Fig.2D**, note arrows, values [3.7x vs. 2.6x], and significance [asterisks]). Collectively, these findings add to an emerging consensus about the importance of IL-4 for the generation of effective antiviral CD8<sup>+</sup>T cell immunity [22, 23] and demonstrate a specific requirement for IL-4 to support the greater I<sup>o</sup> reactivity of aged CD8<sup>+</sup>T<sub>M</sub>; the direct correlation between CD124 expression levels of CD8<sup>+</sup>T<sub>M</sub> and their recall potential as well as the comparable reduction of I<sup>o</sup> and old I<sup>o</sup> CD8<sup>+</sup>T<sub>E</sub> expansions in IL-4<sup>-/-</sup> mice are further consistent with predictions of the “rebound model” that a progressive alignment of CD8<sup>+</sup>T<sub>N</sub> and aging CD8<sup>+</sup>T<sub>M</sub> properties may translate into a reliance on similar co-stimulatory requirements [9].

IL-6 is among the most prominent cytokines induced after an LCMV infection [24] but despite the enhanced responsiveness of aged CD8<sup>+</sup>T<sub>M</sub> to IL-6 stimulation (**Fig.2B**), the differential I<sup>o</sup> responses of transferred young and old CD8<sup>+</sup>T<sub>M</sub> were not compromised by an LCMV Arm challenge of IL-6<sup>-/-</sup> recipients (**Fig.2C**). Using the LCMV cl13 infection protocol, IL-6-deficiency imparted a very modest 1.5-fold reduction of aged but not young I<sup>o</sup> CD8<sup>+</sup>T<sub>E</sub> expansions that also mirrored a 1.4-fold decrease of the I<sup>o</sup> response; neither finding, however, proved significant (**Fig.2D** and not shown) suggesting an overall more limited contribution of IL-6 to differential young and old CD8<sup>+</sup>T<sub>M</sub> recall immunity. As to the potential function of TGF $\beta$  and related cytokines in the context of CD8<sup>+</sup>T<sub>M</sub> aging, we earlier noted a series of marked transcriptional adaptations (increasing mRNA abundance for activin and BMP receptors as well as *Smad1*) and further identified a pronounced increase of TGF $\beta$ RII protein (but not mRNA) expression by aging



CD8<sup>+</sup>T<sub>M</sub> (**Figs.2B, S2** and ref.[9]). The functional relevance of TGFβRII-mediated signaling for LCMV-specific CD8<sup>+</sup>T cells has been illustrated in a persistent infection model where suppression of TGFβRII activity specifically in T cells improved virus control [20]. Thus, increased TGFβRII expression by aging CD8<sup>+</sup>T<sub>M</sub> could conceivably operate to constrain exuberant I<sup>o</sup> CD8<sup>+</sup>T<sub>E</sub> responses. More recent work, however, could not demonstrate a therapeutic effect of TGFβ blockade in chronic LCMV infection [25, 26], and in agreement with those studies we did not observe an unleashing of old I<sup>o</sup> CD8<sup>+</sup>T<sub>E</sub> immunity in our mixed AT/RC system following TGFβ blockade, nor could we discern any impact on the CD8<sup>+</sup>T<sub>M</sub> recall responses at large in either acute or chronic infection models (**Fig.2E**).

### ***Contributions of IFN<sub>γ</sub>, IFN<sub>γ</sub> receptor and FasL to the differential regulation of CD8<sup>+</sup>T<sub>M</sub> recall responses.***

In addition to multiple phenotypic alterations, aging of CD8<sup>+</sup>T<sub>M</sub> also introduces a number of changes among their functional properties that collectively foster a more diversified spectrum of effector activities [9]. Notably, old CD8<sup>+</sup>T<sub>M</sub> produce more IFN<sub>γ</sub> on a per cell basis, and a greater fraction of aged CD8<sup>+</sup>T<sub>M</sub> can be induced to express Fas ligand (FasL) [9]. Together with IL-2, the production capacity of which modestly increases with age [9, 27], IFN<sub>γ</sub> and FasL also share the distinction as the only CD8<sup>+</sup>T<sub>M</sub> effector molecules whose cognate receptors (CD122, CD119 and CD95/Fas, respectively) are concurrently upregulated by aging CD8<sup>+</sup>T<sub>M</sub> (**Fig.S1** and refs.[9, 10]). This can have direct implications for the autocrine regulation of CD8<sup>+</sup>T<sub>M</sub> immunity in the context of recall responses as documented for IL-2 [28], and similar considerations may also apply to IFN<sub>γ</sub> given that its direct action on CD8<sup>+</sup>T cells is required for optimal I<sup>o</sup> CD8<sup>+</sup>T<sub>E</sub> expansions and CD8<sup>+</sup>T<sub>M</sub> development [29]. If CD8<sup>+</sup>T<sub>M</sub>-intrinsic interactions between FasL and Fas shape I<sup>o</sup> CD8<sup>+</sup>T<sub>E</sub> immunity, however, remains elusive.

To correlate the differential CD119 expression by young and old CD8<sup>+</sup>T<sub>M</sub>, confirmed and extended here to different LCMV-specific CD8<sup>+</sup>T<sub>M</sub> populations in peripheral blood (**Figs.3A & S2**), with a direct responsiveness to IFN<sub>γ</sub> action, we determined the extent of STAT1 phosphorylation in young and old p14 T<sub>M</sub>. Interestingly, aged p14 T<sub>M</sub> featured a slight yet significant elevation of constitutive STAT1 phosphorylation, a difference that was further amplified by *in vitro* exposure to IFN<sub>γ</sub> (**Fig.3A**). Thus, taking into account differential CD119 expression levels, responsiveness to IFN<sub>γ</sub>, and IFN<sub>γ</sub> production capacities of young and old CD8<sup>+</sup>T<sub>M</sub> [9], we conducted a first set of mixed AT/RC experiments with IFN<sub>γ</sub><sup>-/-</sup> recipients. In this system, IFN<sub>γ</sub> production is restricted to the transferred CD8<sup>+</sup>T<sub>M</sub> populations but both host cells and donor CD8<sup>+</sup>T<sub>M</sub> can readily respond to IFN<sub>γ</sub>. Comparing CD8<sup>+</sup>T<sub>M</sub> recall responses in LCMV Arm-infected B6 vs. IFN<sub>γ</sub><sup>-/-</sup> recipients, we found that absence of host IFN<sub>γ</sub> modestly compromised the I<sup>o</sup> expansions of both young and old CD8<sup>+</sup>T<sub>M</sub>, though unexpectedly the relative decrease was more pronounced for the former rather than the latter population (**Fig.3B**). We therefore extended our experiments to assess the contribution of IFN<sub>γ</sub> at large by use of a neutralizing antibody. Here, complete IFN<sub>γ</sub> blockade further reduced I<sup>o</sup> CD8<sup>+</sup>T<sub>E</sub>

responses and in particular impaired the  $\text{II}^{\circ}$  response of aged  $\text{CD8}^{+}\text{T}_{\text{E}}$  (**Fig.3B**; compare the increase of relative reductions among young  $\text{II}^{\circ}$   $\text{CD8}^{+}\text{T}_{\text{E}}$  expansions [blood: from 2.6x in  $\text{IFN}\gamma^{-/-}$  hosts to 2.9x after  $\text{IFN}\gamma$  blockade; a 1.1x increase] to those of aged  $\text{II}^{\circ}$   $\text{CD8}^{+}\text{T}_{\text{E}}$  populations [blood: from 1.5x in  $\text{IFN}\gamma^{-/-}$  hosts to 2.4x after  $\text{IFN}\gamma$  blockade; a 1.6x increase]). Together, our findings demonstrate a moderate role for  $\text{IFN}\gamma$  in the regulation of  $\text{CD8}^{+}\text{T}_{\text{M}}$  recall responses to an acute LCMV challenge that differs according to the cellular source of  $\text{IFN}\gamma$ : while the  $\text{II}^{\circ}$  expansion of young  $\text{CD8}^{+}\text{T}_{\text{M}}$ , despite reduced CD119 expression and signaling, is more reliant on  $\text{IFN}\gamma$  production by other cells, aged  $\text{CD8}^{+}\text{T}_{\text{M}}$  populations, on account of enhanced  $\text{IFN}\gamma$  production capacity [9], can better promote their own  $\text{II}^{\circ}$  reactivity. This notion is further reinforced by mixed AT/RC experiments using LCMV cl13 infection under conditions of  $\text{IFN}\gamma$  blockade. As shown in **Fig.3C**, neutralization of  $\text{IFN}\gamma$  profoundly depressed  $\text{II}^{\circ}$   $\text{CD8}^{+}\text{T}_{\text{E}}$  immunity and largely extinguished any differences between young and old  $\text{II}^{\circ}$   $\text{CD8}^{+}\text{T}_{\text{E}}$  expansions (note the comparable population sizes in blood [top] and at the level of total  $\text{II}^{\circ}$   $\text{CD8}^{+}\text{T}_{\text{E}}$  per spleen [bottom] in **Fig.3C**).

In contrast to  $\text{IFN}\gamma$ , the role of FasL:Fas interactions in the LCMV model appears more limited - both FasL- and Fas-mutant mice ( $\text{FasL}^{\text{gld}}$  and  $\text{Fas}^{\text{lpr}}$  strains, respectively) control an acute LCMV infection [30] - yet a non-redundant role for Fas in virus clearance or  $\text{CD8}^{+}\text{T}_{\text{M}}$  generation could be readily demonstrated in mice with compound immunodeficiencies [31-33]. To evaluate the contribution of the FasL:Fas pathway in our model system, we conducted mixed AT/RC experiments with B6 vs.  $\text{Fas}^{\text{lpr}}$  ("B6.lpr") recipients and observed a preferential reduction of aged  $\text{II}^{\circ}$   $\text{CD8}^{+}\text{T}_{\text{E}}$  expansions in the B6.lpr hosts that was especially pronounced following chronic LCMV cl13 infection (**Fig.3D**). Although we can conclude that the enhanced  $\text{II}^{\circ}$  reactivity of old  $\text{CD8}^{+}\text{T}_{\text{M}}$  is in part controlled by their broader FasL induction, the precise mechanisms operative in this context remain to be elucidated and may involve accelerated virus clearance [9] through FasL-dependent cytotoxicity, nonapoptotic FasL:Fas interactions between  $\text{CD8}^{+}\text{T}_{\text{M}}$  and  $\text{T}_{\text{N}}$  that facilitate concurrent  $\text{I}^{\circ}$   $\text{CD8}^{+}\text{T}_{\text{E}}$  differentiation [34], or perhaps the autocrine binding of secreted FasL that, akin to a mechanism proposed for tumor cells [35], may shield  $\text{II}^{\circ}$   $\text{CD8}^{+}\text{T}_{\text{E}}$  from FasL-mediated fratricide.

### ***LFA-1 and CXCR3 blockade preferentially curtail $\text{II}^{\circ}$ expansions of aged $\text{CD8}^{+}\text{T}_{\text{M}}$ .***

Among the array of phenotypic changes accrued during  $\text{CD8}^{+}\text{T}_{\text{M}}$  aging we previously noted several cell surface receptors involved in the regulation of  $\text{CD8}^{+}\text{T}$  cell traffic and migration [9] and demonstrated the importance of their age-associated expression differences in the context of immune homeostasis [10]. Now, using an unbiased approach based on time series gene set enrichment analyses (GSEA) of aging p14  $\text{T}_{\text{M}}$  populations [10], the potential importance of differential "homing receptor" expression is further supported by our identification of the "cell adhesion molecules" module as the top KEGG pathway negatively enriched in old p14  $\text{T}_{\text{M}}$  (normalized enrichment score: -1.82;  $p=0.0078$ ; **Fig.4A**). For 29/38 genes within this module, we also performed temporal protein expression analyses and demonstrated a significant up- or downregulation by aging  $\text{CD8}^{+}\text{T}_{\text{M}}$  for half of these gene products (15/29; **Fig.4A** and ref.[9]). Here, the expression pattern of CD11a/integrin  $\alpha_{\text{L}}$  caught our attention for several reasons: elevated CD11a expression, similar to CD44,

has long been used as a surrogate marker for “antigen-experienced” CD8<sup>+</sup>T cells [36]. In combination with CD18/integrin  $\beta_2$ , CD11a forms the heterodimeric LFA-1 complex that constitutes, together with its endothelial cell-expressed ligands CD54/ICAM1 and CD102/ICAM2, one of the major pathways for leukocyte adhesion. In contrast to CD44, however, CD11a mRNA and protein expression by aging CD8<sup>+</sup>T<sub>M</sub> are subject to a slight yet significant decline (**Figs.4A/B, S2** and ref.[9]). In fact, other components of the LFA-1 pathway exhibited very similar patterns with a progressive decrease of CD8<sup>+</sup>T<sub>M</sub>-expressed CD18, CD102 and in particular CD54 mRNA and/or protein; another LFA-1 ligand, CD50/ICAM5, is not expressed by murine CD8<sup>+</sup>T<sub>E/M</sub> (**Fig.4A/B, S2** and ref.[9]).

LFA-1 biology has been characterized in great detail [37] and the importance of CD11a for the migration of naïve T cells to peripheral LNs is well-established [38], yet the precise role of CD11a in the regulation of pathogen-specific T cell immunity remains incompletely defined. In one of the most detailed report to date, Bose *et al.* found that CD11a-deficiency reduces I<sup>o</sup> *L. monocytogenes*- (LM-) specific CD8<sup>+</sup>T<sub>E</sub> responses, skews CD8<sup>+</sup>T<sub>E</sub> phenotypes in favor of “memory precursors”, preserves major CD8<sup>+</sup>T<sub>E</sub> functions while stunting *ex vivo* CTL activity, attenuates the subsequent contraction phase, and, remarkably, enhances II<sup>o</sup> CD8<sup>+</sup>T<sub>E</sub> expansions by ~1.8-fold following high-dose LM re-challenge [39]. The latter finding, however surprising, is consistent with our “rebound model” of CD8<sup>+</sup>T<sub>M</sub> de-differentiation [9, 10] in that any deficits conveyed by CD11a-deficiency are eclipsed by the advanced maturation stage of CD11a<sup>-/-</sup> CD8<sup>+</sup>T<sub>M</sub> [39] that is associated with greater recall capacity. Similarly, LFA-1 blockade resulted in a ~2-fold reduction of I<sup>o</sup> LCMV-specific CD8<sup>+</sup>T<sub>E</sub> expansions (ref.[40] and not shown) but its potential impact in the specific context of CD8<sup>+</sup>T<sub>M</sub> recall responses has not yet been determined. As based on the experience with LFA-1 blockade in transplantation and autoimmunity [41, 42] and considering in particular the lower CD11a and CD54 expression of naïve CD8<sup>+</sup>T<sub>N</sub> [9], we speculated that CD8<sup>+</sup>T<sub>M</sub> would be overall more resistant to LFA-1 blockade but that declining CD11a and CD54 levels by aging CD8<sup>+</sup>T<sub>M</sub> (**Figs.4A/B & S2**) might render them again somewhat more susceptible to this intervention. Using our mixed AT/RC system, LFA-1 blockade in the context of an LCMV cl13 infection indeed promoted a prominent and preferential reduction of aged as compared to young II<sup>o</sup> CD8<sup>+</sup>T<sub>E</sub> responses in peripheral blood (4.0-fold vs. 2.7-fold) that was less evident in the spleen or after LCMV Arm challenge (**Fig.4C** and not shown). In fact, blocking LFA-1 in the chronic infection model compromised old CD8<sup>+</sup>T<sub>M</sub> recall responses to an extent that approaches the decrease observed for concurrent I<sup>o</sup> CD8<sup>+</sup>T<sub>E</sub> responses (4.1-fold [p=0.0003] and 2.0-fold [p=0.04] reduction in blood and spleen, respectively). The efficacy of LFA-1 blockade therefore correlates inversely with expression levels of CD11a (and other components of the LFA-1 pathway) on CD8<sup>+</sup>T cells such that the inhibition of proliferative expansion is greater for CD8<sup>+</sup>T<sub>N</sub> than CD8<sup>+</sup>T<sub>M</sub>, and more substantial for old than young CD8<sup>+</sup>T<sub>M</sub>. We conclude that aged CD8<sup>+</sup>T<sub>M</sub> populations rely in part on the LFA-1 system to support their improved recall responses in the periphery.

Like the integrins, and often in conjunction, chemokine receptors sensitize T cells to essential spatiotemporal cues required for the effective orchestration of T cell responses [43]. For example, CD8<sup>+</sup>T<sub>E</sub> and T<sub>M</sub> subsets can be recruited to reactive LNs by virtue of their CXCR3 expression [44], and several

reports have detailed the importance of CXCR3 for the precise positioning of CD8<sup>+</sup>T cells in spleen and LNs, and for the measured rather than accelerated development of I<sup>o</sup> CD8<sup>+</sup>T<sub>M</sub> populations [45-48]. However, in regards to the requirement of CD8<sup>+</sup>T<sub>M</sub>-expressed CXCR3 for the regulation of their II<sup>o</sup> responses, strikingly different conclusions were reached: CXCR3-deficiency either improved II<sup>o</sup> CD8<sup>+</sup>T<sub>E</sub> expansions [45], had no effect [46], or compromised II<sup>o</sup> CD8<sup>+</sup>T<sub>E</sub> reactivity [48]. The use of different model systems and experimental protocols may have contributed to the divergent outcomes but another factor may be the precise timing of re-challenge experiments since CXCR3 expression by splenic and blood-borne virus-specific CD8<sup>+</sup>T<sub>M</sub> changes substantially over a period of ~18 months ([9, 49] and **Figs.4D & S2**). To circumvent potentially confounding factors associated with the generation of CXCR3<sup>-/-</sup> CD8<sup>+</sup>T<sub>M</sub>, we used a non-depleting CXCR3 antibody [50] and the results of our mixed AT/RC studies demonstrate that CXCR3 is indeed required for optimal II<sup>o</sup> CD8<sup>+</sup>T<sub>E</sub> expansions. Specifically, CXCR3 blockade preferentially weakened the II<sup>o</sup> response of old as compared to young CD8<sup>+</sup>T<sub>M</sub>, did so in a systemic fashion (i.e. was observed in blood, spleen and LNs), and to an extent that somewhat exceed the impairment of contemporaneous I<sup>o</sup> CD8<sup>+</sup>T<sub>E</sub> expansions (2.2-fold [p=0.0005] and 3.5-fold [p=0.0035] decrease in blood and spleen, respectively) (**Fig.4E**). Ready access for CD8<sup>+</sup>T<sub>M</sub> to local regions of CXCR3 ligand (CXCL9/10) expression [45-48] therefore constitutes an important parameter for the optimal systemic expansion of II<sup>o</sup> CD8<sup>+</sup>T<sub>E</sub> populations, and aged CD8<sup>+</sup>T<sub>M</sub>, by virtue of enhanced CXCR3 expression, are poised to effectively harness these interactions.

### ***CD28- but not CD27-dependent co-stimulation preferentially promotes enhanced II<sup>o</sup> reactivity of aged CD8<sup>+</sup>T<sub>M</sub>.***

Recall responses are traditionally regarded as “co-stimulation independent” but more recent work has documented an important role especially for CD28 in the regulation of pathogen-specific II<sup>o</sup> CD8<sup>+</sup>T<sub>E</sub> immunity [51]. Although our original analysis of genes differentially expressed by young and old CD8<sup>+</sup>T<sub>M</sub> included few members of the major co-stimulatory B7 and TNF superfamilies [9], the temporal GSEAs conducted here captured many more subtle alterations, including an upregulation of *Cd28* by aging p14 T<sub>M</sub> (**Fig.4A** and not shown). A corresponding age-associated augmentation of CD28 protein expression was confirmed and extended here to blood-borne D<sup>b</sup>NP<sub>396</sub><sup>+</sup> and D<sup>b</sup>GP<sub>33</sub><sup>+</sup>CD8<sup>+</sup>T<sub>M</sub> populations, and similar experiments corroborated a particularly prominent increase for CD27 (**Figs.5A & S2**), a co-stimulatory receptor that exhibits some of the most pronounced expression differences between young and old CD8<sup>+</sup>T<sub>M</sub> [9].

Despite the general importance of the CD27:CD70 co-stimulatory pathway [52], its contribution to the regulation of LCMV-specific CD8<sup>+</sup>T<sub>E</sub> immunity appears to be more limited. CD70 blockade or deficiency modestly reduced LCMV-specific I<sup>o</sup> CD8<sup>+</sup>T<sub>E</sub> expansions after an acute virus challenge but left the II<sup>o</sup> response largely intact [53-55]. We made near identical observations in our mixed AT/RC Arm model conducted under conditions of CD70-blockade, i.e. we found a small reduction of I<sup>o</sup> host CD8<sup>+</sup>T<sub>E</sub> responses (not shown) whereas the overall and differential expansions of young and old II<sup>o</sup> CD8<sup>+</sup>T<sub>E</sub> populations were fully preserved (**Fig.5B**). Blocking CD70 in the context of a chronic or high-dose LCMV infection, however, was reported to promote the opposite effect of modestly increasing I<sup>o</sup> but decreasing II<sup>o</sup> CD8<sup>+</sup>T<sub>E</sub> responses

[54, 56]. Again, these results were essentially reproduced in our experiments where LCMV cl13-induced  $I^o$   $CD8^+T_E$  host responses under conditions of CD70 blockade were somewhat elevated (~1.6-fold, not shown) yet concomitant young and old  $II^o$   $CD8^+T_E$  expansions were both slightly reduced (**Fig.5B**). Regardless of the relatively small impact exerted by CD70-blockade on the coordination of  $CD8^+T_E$  cell immunity, the divergent regulation of  $I^o$  and  $II^o$   $CD8^+T_E$  responses in the same microenvironment indicates that CD27:CD70-mediated interactions are not only contingent on pathogen virulence, tropism, persistence and related parameters [52, 53] but also on the differentiation stage of specific  $CD8^+T$  cells themselves. At the same time, the large increase of CD27 expression by aging  $CD8^+T_M$  remains unexpectedly inconsequential for the regulation of their  $II^o$  reactivity.

With regard to the gradual increase of CD28 expression by aging  $CD8^+T_M$  (**Figs.4A, 5A & S2**), earlier work by us and others has already implicated the CD28:CD80/86 pathway in the regulation of LCMV-specific  $II^o$   $CD8^+T_E$  immunity [57, 58] raising the possibility that a more efficient use of these interactions by old  $CD8^+T_M$  may boost their recall responses. In confirmation of this prediction, the impairment of  $II^o$   $CD8^+T_E$  expansions after CD28-blockade in the mixed AT/RC Arm scenario was more pronounced for old as compared to young  $CD8^+T_M$  (13-fold vs. 5-fold) and resulted in the obliteration of any numerical differences between young and old  $II^o$   $CD8^+T_E$  populations (**Fig.5C/D**). An accompanying ~3.5-fold decrease of  $I^o$  NP<sub>396</sub>-specific host populations (not shown) essentially replicated the phenotype of LCMV-challenged  $CD28^{-/-}$  mice [59] and the apparently lesser impact of CD28-blockade on  $I^o$   $CD8^+T_E$  responses may be due to the lower CD28 expression by  $CD44^{lo}CD8^+T_N$  (**Fig.5A**). Using an alternative approach to probe the CD28:CD80/86 pathway, we conducted mixed AT/RC experiments with  $CD80/86^{-/-}$  recipients. Based on our previous work, we anticipated a critical difference employing LCMV Arm vs. cl13 re-challenge protocols: despite the reliance of  $CD8^+T_M$  recall responses on CD28, re-challenge with LCMV Arm proved independent of CD80/86 suggesting the existence of another CD28 ligand; in contrast,  $II^o$   $CD8^+T_E$  expansions were clearly CD80/86-dependent following an LCMV cl13 re-challenge [58]. In agreement with these findings, neither  $II^o$  nor concurrent  $I^o$   $CD8^+T_E$  responses elicited in the mixed AT/RC Arm system were affected by CD80/86-deficiency (**Fig.5E**). Yet a LCMV cl13 infection not only reduced  $CD8^+T_M$  recall reactivity in general but preferentially comprised the accumulation of aged (6.4-fold) as compared to young (3.6-fold)  $II^o$   $CD8^+T_E$  (**Fig.5E**). Together, these results support the notion that CD28-mediated co-stimulation contributes specifically to the improved  $II^o$  reactivity of aged  $CD8^+T_M$ .

### ***Role of CD40L and CD4<sup>+</sup>T cells in the differential regulation of young and old $II^o$ $CD8^+T_E$ responses.***

In extension of our investigation into co-stimulatory pathways above, we also evaluated the potential involvement of CD40L:CD40 interactions in the regulation of  $II^o$   $CD8^+T_E$  immunity, experiments prompted by our observation that aged  $CD8^+T_M$  synthesize larger amounts of CD40L upon re-stimulation [9]. Although  $CD8^+T$  cell-produced CD40L appears dispensable for  $I^o$   $CD8^+T_E$  responses [60], it readily promotes DC activation, B cell proliferation and antibody production (activities usually associated with  $CD4^+$  “helper” T cells) [61], and may boost  $II^o$   $CD8^+T_E$  immunity under conditions of limited inflammation [62]. Similarly, our



previous work has documented that CD40L blockade administered within the first week of acute LCMV Arm infection does not impinge on  $I^o$  CD8<sup>+</sup>T<sub>E</sub> responses but affects subsequent CD8<sup>+</sup>T<sub>M</sub> development as revealed by impaired  $II^o$  *in vitro* CTL activity [63]. While these results point towards a more limited and context-dependent role for CD8<sup>+</sup>T cell-produced CD40L, any interpretation of outcomes observed after anti-CD40L treatment has to consider that it targets both CD4<sup>+</sup> and CD8<sup>+</sup>T cell subsets.

In the mixed AT/RC Arm setting employed here, acute CD40L blockade did not compromise either  $I^o$  (not shown) or  $II^o$  CD8<sup>+</sup>T<sub>E</sub> responses (**Fig.5C**), observations that are also consistent with the finding that provision of additional CD4<sup>+</sup>T cell help did not embellish either  $I^o$  or  $II^o$  p14 T<sub>E</sub> expansions in the wake of an LCMV Arm infection [64]. Yet the situation was reportedly different in the chronic LCMV model: supplementary CD4<sup>+</sup>T cell help increased  $II^o$  but not  $I^o$  p14 T<sub>E</sub> responses, and the effect was abolished by CD40L blockade supporting the conclusion that CD8<sup>+</sup>T<sub>M</sub> are more reliant than CD8<sup>+</sup>T<sub>N</sub> on CD40L-mediated CD4<sup>+</sup>T cell help [64]. In the experiments shown in **Fig.5F**, we quantified CD8<sup>+</sup>T<sub>E</sub> expansions after mixed AT/RC cl13 under conditions of CD40L blockade. Similar to West *et al.* [64], we found no obvious impact on  $I^o$  CD8<sup>+</sup>T<sub>E</sub> responses (not shown) but readily observed a significant reduction of young  $II^o$  CD8<sup>+</sup>T<sub>E</sub> populations; nearly identical results were obtained when the experiments were performed with CD4<sup>+</sup>T cell-depleted recipients (**Fig.5F**). Although these results fail to identify a specific contribution for CD8<sup>+</sup>T<sub>M</sub>-expressed CD40L to the regulation of recall responses, they confirm the notion of CD40L:CD40 interactions as an accessory pathway for the optimal elaboration of  $II^o$  but not  $I^o$  CD8<sup>+</sup>T<sub>E</sub> responses. Perhaps most interesting is the fact that aged  $II^o$  CD8<sup>+</sup>T<sub>E</sub> reactivity, just like  $I^o$  CD8<sup>+</sup>T<sub>E</sub> responses, remained largely unperturbed by either CD40L-blockade or absence of CD4<sup>+</sup>T cell help in the AT/RC cl13 model (**Fig.5F**, and data not shown). This outcome is in fact predicted by the “rebound model” of CD8<sup>+</sup>T<sub>M</sub> maturation which proposes a progressive harmonization of aging CD8<sup>+</sup>T<sub>M</sub> properties with those of CD8<sup>+</sup>T<sub>N</sub> [9, 10], and thus over time a waning importance for CD4<sup>+</sup>T cell help. The model can also explain the seemingly contrasting conclusion that LM-specific CD8<sup>+</sup>T<sub>M</sub> recall responses become *more* CD4<sup>+</sup>T cell-dependent with age [65]: as opposed to the CD4<sup>+</sup>T cell-independent LCMV Arm system, Marzo *et al.* employed an LM infection protocol where CD4<sup>+</sup>T cell depletion greatly reduced  $I^o$  CD8<sup>+</sup>T<sub>E</sub> responses [65]. The complementary observation that CD4<sup>+</sup>T cell depletion in the context of an LM re-challenge also curtailed  $II^o$  CD8<sup>+</sup>T<sub>E</sub> expansions, and that this effect became more pronounced with advancing age [65] further indicates that aging CD8<sup>+</sup>T<sub>M</sub> gradually re-establish a reliance on CD4<sup>+</sup>T cell help akin to that exhibited by CD8<sup>+</sup>T<sub>N</sub>.

### **Enforced SAP expression constrains $II^o$ CD8<sup>+</sup>T<sub>E</sub> expansions.**

The expression patterns of CD2/SLAM family genes and proteins provide yet another example for the converging temporal regulation of CD8<sup>+</sup>T<sub>M</sub> properties within a defined molecular family: with the exception of stable SLAMF3/Ly9 levels, both mRNA and protein expression of other CD2/SLAM family members were progressively downmodulated in aging CD8<sup>+</sup>T<sub>M</sub> populations [9]. The functional relevance of these phenotypic changes, however, is difficult to predict since they pertain to both activating and inhibitory receptors, and studies with various blocking/activating antibodies and SLAM receptor-deficient mouse

strains have generated at times conflicting results [66]. Even so, since all signaling events transduced by T cell-expressed SLAM receptors operate through the same small adaptor SAP (SLAM-associated protein) [66], a slight decline of *Sh2d1a* message in aging CD8<sup>+</sup>T<sub>M</sub> was noteworthy [9] in light of earlier work with SAP<sup>-/-</sup> mice that demonstrated an increase of I<sup>o</sup> virus-specific CD8<sup>+</sup>T<sub>E</sub> expansions and associated virus control [66]. The precise cause for this enhancement remains to be determined but a contributing if not essential factor is likely an impairment of activation-induced cell death (AICD) in the SAP<sup>-/-</sup> mice [67]. In our experiments, however, the decrease of *Sh2d1a* in aging CD8<sup>+</sup>T<sub>M</sub> was not accompanied by a corresponding reduction of SAP protein expression [9], and eight days after mixed AT/RC Arm, the activation-induced increase of SAP was not significantly different between young and old II<sup>o</sup> CD8<sup>+</sup>T<sub>E</sub> (not shown).

Despite these caveats, we chose to explore the additional possibility of differential SAP induction specifically in the earliest phase of the II<sup>o</sup> response. To this end, we employed the “p14 chimera” model and compared the initial recall response of young and aged p14 T<sub>M</sub> by CFSE dilution both *in vivo* and *in vitro*. Although we observed similar proliferation patterns for all II<sup>o</sup> p14 T<sub>E</sub> populations (**Fig.6A**), more detailed analyses of the *in vitro* studies suggested that aged p14 T<sub>M</sub> might start to divide a little earlier (*i.e.*, exhibiting a ~1.4-fold higher division indices, not shown) yet the identical proliferation indices of young and old II<sup>o</sup> p14 T<sub>E</sub> (**Fig.6A**) are consistent with our earlier conclusion about the comparable antigen-driven proliferation of young and old II<sup>o</sup> NP<sub>396</sub>-specific CD8<sup>+</sup>T<sub>E</sub> in the periphery [9]. Importantly though, the better survival of aged II<sup>o</sup> CD8<sup>+</sup>T<sub>E</sub> in our *in vivo* model [9] corresponded to higher numbers of old II<sup>o</sup> p14 T<sub>E</sub> surviving in the *in vitro* culture system (**Fig.6A**) supporting the general utility of the latter experimental approach. We then proceeded with the quantification of SAP expression as a function of *in vitro* proliferation and found that the early II<sup>o</sup> effector phase of young but not old p14 T<sub>M</sub> was accompanied by a significant elevation of SAP levels (**Fig.6A**). Thus, the increased *in vitro* accumulation of aged II<sup>o</sup> p14 T<sub>E</sub> correlates with their lower SAP expression which is consistent with the notion of impaired AICD in the absence of SAP [67].

To formally evaluate the hypothesis that the amount of induced SAP expression determines the recall reactivity of II<sup>o</sup> CD8<sup>+</sup>T<sub>E</sub> populations, we generated retroviral p14 chimeras that overexpress SAP selectively in subpopulations of p14 T<sub>E/M</sub> as detailed in **Fig.6B/C** and Methods. Following purification of p14 T<sub>M</sub> transduced with SAP or control retroviruses, AT into naïve B6 hosts and re-challenge with LCMV Arm or cl13 (**Fig.6D**), enforced SAP expression indeed compromised II<sup>o</sup> p14 T<sub>E</sub> expansions (**Fig.6E/F**, and data not shown). Collectively, our experiments therefore indicate that the improved antigen-driven II<sup>o</sup> expansion of aged CD8<sup>+</sup>T<sub>M</sub> is facilitated by their restrained upregulation of SAP expression. Interestingly, a previous report using T cell hybridomas demonstrated that engagement of a single SLAM receptor, SLAMF4/CD244, could transmit either stimulatory or inhibitory signals depending on the degree of CD244 expression, ligand (CD48) density and, importantly, the level of SAP expression itself [68]. Although those results correlated high SAP expression with activation rather than inhibition [68], an increase of CD244:CD48 interactions could nevertheless convey inhibitory signals even in the presence of elevated SAP expression [69]. Furthermore, in the chronic LCMV model, CD244 was assigned a predominantly inhibitory function as based on enhanced NK cell activity in CD244<sup>-/-</sup> mice as well as the greater II<sup>o</sup> reactivity of CD244<sup>-/-</sup> p14 T<sub>M</sub> in the

AT/RC cl13 system [64, 70], and most recent work specifies that inhibitory functions exerted by the entire *Slam* locus on NK cell responses are solely based on CD244 activity [71]. It should therefore be interesting to assess if the early (though not late) recall response of CD244<sup>-/-</sup> CD8<sup>+</sup>T<sub>M</sub> also involves a subdued induction of SAP, and, in more general terms, to determine how precisely CD8<sup>+</sup>T cell-expressed SAP integrates intrinsic signals from SLAMF1-7 receptors [9] *in vivo* to modulate II<sup>0</sup> CD8<sup>+</sup>T<sub>E</sub> immunity.



## DISCUSSION

As a widely used preclinical experimental system, the LCMV model has proved extraordinarily helpful in shaping our understanding of protective T cell memory as well as its limitations in the context of persistent viral infections [2, 72, 73]. Here, we used the LCMV model to interrogate over a dozen molecular pathways for their contribution to the embellishment of CD8<sup>+</sup>T<sub>M</sub> recall responses, and our results are noteworthy for the identification of 1., diverse molecular interactions that specifically promote the greater II<sup>o</sup> CD8<sup>+</sup>T<sub>E</sub> expansions of aged CD8<sup>+</sup>T<sub>M</sub> populations; 2., the distinct outcomes observed after acute vs. chronic LCMV re-challenge; and 3., the receptors/ligands that, against expectation, apparently did not participate in the regulation of II<sup>o</sup> CD8<sup>+</sup>T<sub>E</sub> immunity.

To explore the possibility that improved recall responses of aged CD8<sup>+</sup>T<sub>M</sub> emerge as the net result of multiple disparate molecular interactions, we selected a diverse set of pathways comprising cytokine signaling, T cell trafficking, co-stimulation and -inhibition, and effector functionalities as based on the long-term expression kinetics of the respective CD8<sup>+</sup>T<sub>M</sub>-expressed receptors/ligands (the relative robustness of these temporal expression patterns is now supported by an extension of our earlier analyses to blood-borne aging antiviral CD8<sup>+</sup>T<sub>M</sub> populations, and to subsets with different epitope specificities and TCR affinities/avidities [9]). Our results demonstrate that IL-4-, LFA-1-, CXCR3- and CD28-dependent interactions, a restrained induction of SAP expression, and CD8<sup>+</sup>T<sub>M</sub>-produced FasL and IFN $\gamma$  not only contribute to efficient II<sup>o</sup> CD8<sup>+</sup>T<sub>E</sub> expansions in general, but in particular convey a set of heterogeneous signals that collectively boost the recall reactivity of aged CD8<sup>+</sup>T<sub>M</sub> populations. While the relative contribution of individual molecular pathways to the regulation of recall responses ranges from the modest to the more pronounced (e.g., a 2.8-fold reduction of LCMV Arm-driven aged II<sup>o</sup> CD8<sup>+</sup>T<sub>E</sub> expansions under conditions of IFN $\gamma$  neutralization vs. a 13-fold inhibition in the context of CD28 blockade), the overall efficacy of II<sup>o</sup> CD8<sup>+</sup>T<sub>E</sub> immunity and immune protection [9] is shaped by the integrated activity of different pathways the individual or combined therapeutic targeting of which may in fact allow for the tailored modulation of specific CD8<sup>+</sup>T<sub>M</sub> responses.

Furthermore, the above interactions are for the most part of greater importance to the regulation of II<sup>o</sup> CD8<sup>+</sup>T<sub>E</sub> immunity in response to a chronic rather than acute viral challenge. Recent work supports the notion that the eventual or at least partial control of chronic viral infections relies on a multiplicity of molecular pathways that are often dispensable for clearance of acute virus infections [74]. Our findings extend this concept to the context of II<sup>o</sup> CD8<sup>+</sup>T<sub>E</sub> responses by documenting that CD8<sup>+</sup>T<sub>M</sub>, far from being “co-stimulation independent”, also require the productive engagement of diverse molecular interactions to unfold their full recall potential when confronted with a chronic virus challenge. A further elucidation of these phenomena might very well help to establish an adjusted perspective onto one of the central tenets of T cell memory, namely its presumed imperviousness to the modulation by biochemical pathways commonly referred to as “signal 2 & signal 3”. In fact, the “rebound model” [9], together with the present report, suggests that aging

CD8<sup>+</sup>T<sub>M</sub> become increasingly reliant on the very same “signal 2 & signal 3” interactions that, dependent on the experimental system, also control I<sup>o</sup> CD8<sup>+</sup>T<sub>E</sub> differentiation.

Two pathways interrogated in the present study were found to be of preferential importance to the regulation of young rather than old I<sup>o</sup> CD8<sup>+</sup>T<sub>E</sub> responses. Here, the greater dependence of young CD8<sup>+</sup>T<sub>M</sub> recall responses on CD4<sup>+</sup>T cell help and CD40L-mediated interactions in the chronic LCMV system is essentially consistent with the “rebound model”, but the enhanced reliance of young CD8<sup>+</sup>T<sub>M</sub> on non-CD8<sup>+</sup>T<sub>M</sub>-produced IFN $\gamma$ , despite reduced CD119/IFN $\gamma$ R1 expression and sensitivity, was unexpected. IFN $\gamma$  can exert both stimulatory and inhibitory effects on CD8<sup>+</sup>T<sub>E</sub> populations [29, 75], and the specific balance achieved between these opposing signals may be distinct for young and old CD8<sup>+</sup>T<sub>M</sub>, perhaps as a result of differential IFN $\gamma$ R2 induction [76], but ultimately the reasons for the greater role of host IFN $\gamma$  in control of young I<sup>o</sup> CD8<sup>+</sup>T<sub>E</sub> immunity remain unclear. We also found that several other cytokine signaling and co-stimulatory pathways (IL-6, IL-7, IL-15, TSLP, TGF $\beta$ , CD27:CD70) appeared to have at best a minor impact on the regulation of I<sup>o</sup> CD8<sup>+</sup>T<sub>E</sub> responses. While these results underscore the obvious fact that promising clues gleaned from a comprehensive set of databases [9] need not necessarily translate into biologically relevant differences within a given model system, they neither rule out potential redundancies not investigated in the present study nor the possibility that these as well as additional pathways may be operative in the context of other experimental and naturally occurring scenarios. Therefore, in as much as the “rebound model” of extended CD8<sup>+</sup>T<sub>M</sub> maturation applies to pathogen infections in general, the progressive “de-differentiation” of aging CD8<sup>+</sup>T<sub>M</sub>, especially given the “programmed” nature of this process [9], may allow them to brace for more effective recall responses under a greater variety of productive pathogen re-encounters. At the same time, the multitude of diverse molecular pathways involved in shaping improved clinical outcomes also provides an abundance of different targets for potential therapeutic interventions.

## MATERIALS AND METHODS

### **Ethics statement**

All procedures involving laboratory animals were conducted in accordance with recommendations in the “Guide for the Care and Use of Laboratory Animals of the National Institutes of Health”, the protocols were approved by the Institutional Animal Care and Use Committees (IACUC) of the University of Colorado (permit numbers 70205604[05]1F, 70205607[05]4F and B-70210[05]1E) and Icahn School of Medicine at Mount Sinai (IACUC-2014-0170), and all efforts were made to minimize suffering of animals

### **Mice, virus and challenge protocols**

C57BL6/J (B6), congenic B6.CD90.1 (B6.PL-*Thy1<sup>a</sup>*/CyJ) and B6.CD45.1 (B6.SJL-*Ptprc<sup>a</sup>* *Pepc<sup>b</sup>*/BoyJ), IL-4<sup>-/-</sup> (B6.129P2-*Il4<sup>tm1Cgn</sup>*/J), IL-6<sup>-/-</sup> (B6.129S2-*Il6<sup>tm1Kopf</sup>*/J), IFN $\gamma$ <sup>-/-</sup> (B6.129S7-*Ifng<sup>tm1Ts</sup>*/J), CD80/86<sup>-/-</sup> (B6.129S4-*Cd80<sup>tm1Shr</sup>* *Cd86<sup>tm2Shr</sup>*/J) and B6.lpr (B6.MRL-*Fas<sup>lpr</sup>*/J) mice on the B6 background were purchased from The Jackson Laboratory; B6.IL-15<sup>-/-</sup> (C57BL/6NTac-*IL15<sup>tm1Imx</sup>* N5) mice were acquired from Taconic; and p14 mice harboring TCRtg CD8<sup>+</sup>T cells specific for the dominant D<sup>b</sup>-restricted LCMV-GP<sub>33-41</sub> determinant were obtained on a B6.CD90.1 background from Dr. M. Oldstone. We only used male mice in this study to avoid potential artifacts that may arise in gender mismatched AT settings. LCMV Armstrong (clone 53b) and clone 13 (cl13) were obtained from Dr. M. Oldstone, and grown and titered as described [77]. For I<sup>o</sup> challenges, 8-10 week old mice were infected with a single intraperitoneal (i.p.) dose of 2x10<sup>5</sup> plaque-forming units (pfu) LCMV Arm; for II<sup>o</sup> challenges, naïve congenic recipients of various CD8<sup>+</sup>T<sub>M</sub> populations were inoculated with 2x10<sup>5</sup> pfu LCMV Arm i.p. or 2x10<sup>6</sup> pfu LCMV cl13 i.v. Infected mice were housed under SPF conditions and monitored for up to ~2 years. As discussed elsewhere [9, 10], exclusion criteria for aging LCMV-immune mice in this study included gross physical abnormalities (lesions, emaciation and/or weight loss), lymphatic tumors as indicated by enlarged LNs at time of necropsy, and T cell clonal expansions among virus-specific CD8<sup>+</sup>T<sub>M</sub> populations (D<sup>b</sup>NP<sub>396</sub><sup>+</sup>, D<sup>b</sup>GP<sub>33</sub><sup>+</sup> or D<sup>b</sup>GP<sub>276</sub><sup>+</sup>); according to these criteria, up to ~30% of aging mice were excluded from the study.

### **Tissue processing, cell purification and adoptive transfers (AT)**

Lymphocytes were obtained from blood, spleen and LNs according to standard procedures [78]. Enrichment of splenic T cells was performed with magnetic beads using variations and adaptations of established protocols [9] and reagents purchased from StemCell Technologies, Miltenyi Biotec and Invitrogen/Caltag (**Table S1**). For mixed AT/RC experiments, CD8<sup>+</sup>T<sub>M</sub> from young and aged LCMV-immune B6 and B6-congenic donors were enriched by combined depletion of B and CD4<sup>+</sup>T cells (or only B cells) followed by 1:1 combination at the level of D<sup>b</sup>NP<sub>396</sub><sup>+</sup>CD8<sup>+</sup>T<sub>M</sub>, i.v. AT of mixed populations containing 2-10x10<sup>3</sup> young and old D<sup>b</sup>NP<sub>396</sub><sup>+</sup>CD8<sup>+</sup>T<sub>M</sub> each into naïve congenic recipients, and challenge with LCMV

(**Figs.1A-D, 2C-E, 3B-D, 4C/E & 5B-F**). For construction of p14 chimeras [9], CD8<sup>+</sup>T cells were enriched from spleens of naïve CD90.1<sup>+</sup> p14 mice by negative selection, and 5x10<sup>4</sup> purified p14 cells were transferred i.v. into B6 recipients prior to LCMV infection 2-24h later (**Figs.2B, 3A, 4A, 6A & S1**). *In vivo* proliferation of II<sup>o</sup> p14T<sub>E</sub> was assessed by AT of 10<sup>6</sup> young or old CFSE-labeled p14 T<sub>M</sub> into B6 recipients and LCMV Arm challenge as detailed in ref [9]; analyses were then conducted with II<sup>o</sup> p14T<sub>E</sub> recovered from recipient spleens 64h later (**Fig.6A**).

### **Stimulation cultures**

Splenic single cell suspensions prepared from young and old LCMV-immune p14 chimeras were cultured for 15min in complete RPMI with graded dosages of recombinant cytokines (murine IL-4, IL-6, IL-10, IFN $\gamma$ ; Peprotech) prior to fixation with PFA buffer, processing and combined CD90.1 and intracellular pSTAT staining (**Figs.2B & 3A**). For *in vitro* proliferation and survival assays, lymphocyte-purified PBMC from young and old LCMV-immune p14 chimeras were labeled with CFSE, adjusted to contain the same number of p14 T<sub>M</sub>, and cultured for 72h with T cell-depleted, LCMV-GP<sub>33-41</sub> peptide-coated B6 spleen cells; numbers of surviving p14 T cells were subsequently calculated using Countess (Invitrogen) or Vi-Cell (Beckmann Coulter) automated cell counters (**Fig.6A**).

### **Flow cytometry**

All reagents and materials used for analytical flow cytometry are summarized in **Table S1**, and our basic staining protocols are described and/or referenced in ref.[9]. Detection of phosphorylated STAT proteins (**Figs.2B & 3A**) was performed using a methanol-based cell permeabilization as described [79]. All samples were acquired on FACSCalibur, LSR II (BDBiosciences) or Cyan (Beckman Coulter) flow cytometers and analyzed with DIVA (BDBiosciences) and/or FlowJo (TreeStar) software; visualization of *in vivo* and *in vitro* T cell proliferation by step-wise dilution of CFSE and calculation proliferation and division indices was performed using the FlowJo “proliferation platform” (**Fig.6A**).

### **Microarray analyses**

Details for microarray analyses of highly purified p14 T<sub>EM</sub> populations and time series GSEAs (**Figs.4A & S1**) are found in refs.[9, 10].

### **In vivo antibody treatment**

For *in vivo* blockade of cytokine signaling, T cell trafficking or co-stimulation (**Figs.1B/C, 2E, 3B/C, 4C/E & 5B-D/F**), naïve B6 or B6 congenic recipients were injected i.p. with antibodies ~2h before AT of mixed CD8<sup>+</sup>T<sub>M</sub> populations and subsequent LCMV infection as well as on d2 and d4 after challenge ( $\alpha$ IL-7

[M25] &  $\alpha$ IL-7Ra [A7R34]: 3x500 $\mu$ g each;  $\alpha$ TGF $\beta_{1,2,3}$  [1D11.16.8]: 3x1000 $\mu$ g;  $\alpha$ IFN $\gamma$  [XMG1.2]: 3x1000 $\mu$ g;  $\alpha$ CXCR3 [CXCR3-173]: 3x100 $\mu$ g;  $\alpha$ CD70: [FR70]: 3x250 $\mu$ g;  $\alpha$ CD154/CD40L [MR1]: 3x250 $\mu$ g;  $\alpha$ CD28 [37.51]: 3x100 $\mu$ g;  $\alpha$ CD62L [MEL-14]: 3x150 $\mu$ g;  $\alpha$ CD11a/LFA-1 [KBA]: 2x200 $\mu$ g on d0 and d2 only; corresponding control antibodies: dosages commensurate to experimental antibodies); CD4<sup>+</sup>T cell depletion was achieved by i.p. injection of 200 $\mu$ g GK1.5 antibody on days -1 and +1 in relation to AT/RC [80]. Further details about all *in vivo* antibodies are provided in **Table S1**.

## Retroviral transductions, chimera construction and transduced p14 T<sub>M</sub> purification

Murine *Sh2d1a* (SAP) cDNA was purchased from Open Biosystems (clone ID 1400188) and sub-cloned into a murine stem cell virus- (MSCV-) based retroviral pMiG vector that contains GFP as a reporter (gift from P. Marrack). To generate retroviruses, pMiG-empty or pMiG-SAP plasmids were co-transfected with PsiEco helper plasmid into Phoenix 293T cells using Eugene 6 (Roche) according to standard procedures [79]. After 48h, retroviral supernatants were harvested and spin-transductions of *in vivo* activated p14 splenocytes (naïve p14 mice infected with 2x10<sup>6</sup> pfu LCMV Arm i.v. 24h earlier) were performed for 90min at 32°C in the presence of 8 $\mu$ g/mL polybrene, 10mM HEPES and 10 $\mu$ g/mL recombinant hIL-2. Transduced p14 splenocytes were transferred “blind” into naïve B6 mice that were subsequently infected with 2x10<sup>5</sup> pfu LCMV Arm i.p. (**Fig.6B**), and effective transduction levels were verified in blood-borne p14 T<sub>E</sub> 8 days later (**Fig.6C**). For subsequent AT/RC experiments, transduced p14 T<sub>M</sub> (CD4<sup>+</sup> B220<sup>-</sup>CD90.1<sup>+</sup>GFP<sup>+</sup>) were purified from spleens using a Coulter Moflo XDP cell sorter.

## Statistical analyses

Data handling, analysis and graphic representation was performed using Prism 6.0c (GraphPad Software). All data summarized in bar and line diagrams are expressed as mean  $\pm$ 1 standard error (SEM), and asterisks indicate statistical differences calculated by Student’s t-test, or one-way ANOVA with Dunnett’s multiple comparisons test, and adopt the following convention: \*: p<0.05, \*\*: p<0.01 and \*\*\*: p<0.001.

## ACKNOWLEDGEMENTS

We wish to thank Drs. R. Gill, P. Marrack and A. Veillette for the generous gift of several unique antibodies (**Table S1**), Drs. Z. Yi and W. Zhang for conducting the GSEAs, Dr. E. Clambey for assistance with the collection of blood and tissue samples, and the NIH Tetramer Core Facility for provision of biotinylated MHC:peptide monomers. This work was supported by NIH AG026518 and AI093637, JDRF CDA 2-2007-240, and DERC P30-DK057516 (DH), and NIH T32 training grants AI07405, AI052066 and DK007792 (BD); the funders had no role in study design, data collection and analysis, decision to publish, or preparation of the manuscript.

## FIGURE LEGENDS

**Figure 1. No role for IL-7, TSLP or IL-15 in the differential regulation of young and old  $\text{II}^0 \text{CD8}^+ \text{T}_E$  expansions.** **A.**, basic design of mixed AT/RC experiments.  $\text{CD8}^+ \text{T}$  cells from congenic young and old LCMV-immune donors were enriched, combined 1:1 at the level of  $\text{D}^b\text{NP}_{396}^+ \text{CD8}^+ \text{T}_M$ , and transferred i.v. into recipients that were subsequently challenged using “acute” (LCMV Arm) or “chronic” (LCMV cl13) infection protocols; proliferative expansions of  $\text{II}^0 \text{D}^b\text{NP}_{396}^+ \text{CD8}^+ \text{T}_E$  were quantified 8 days later. Note that the constellation of congenic markers permits the distinction of young and old  $\text{II}^0 \text{CD8}^+ \text{T}_E$  as well as  $\text{I}^0 \text{CD8}^+ \text{T}_E$  generated by the host. Unless noted otherwise, treatment with blocking antibodies was performed ~2h before AT and on d2 and d4 after virus inoculation; in other cases, B6 vs. immunodeficient recipients were used (not shown). **B.**, quantification of  $\text{II}^0 \text{CD8}^+ \text{T}_E$  expansions under conditions of control (PBS) or combined  $\alpha\text{IL-7}/\alpha\text{IL-7Ra}$  treatment and LCMV Arm challenge; the age of donor  $\text{CD8}^+ \text{T}_M$  is indicated in the legend (young: d50, old: d518) **C.**, similar experiments as in panel B but conducted with LCMV cl13 and control treatment with rat IgG (donor age indicated in legend). **D.**, mixed AT/RC experiments performed with B6 vs.  $\text{B6.IL-15}^{-/-}$  recipients (AT of  $2 \times 10^3$  [panel B & D] or  $10 \times 10^3$  [panel C] young and old  $\text{D}^b\text{NP}_{396}^+ \text{CD8}^+ \text{T}_M$  each;  $n \geq 3$  mice/group; asterisks indicate significant differences comparing young and old  $\text{II}^0 \text{D}^b\text{NP}_{396}^+ \text{CD8}^+ \text{T}_E$  populations using Student’s t-test).

**Figure 2. Divergent requirements of IL-4, IL-6 and TGF $\beta$  for enhanced  $\text{II}^0$  reactivity of aged  $\text{CD8}^+ \text{T}_M$ .** **A.**, cytokine receptor expression levels by blood-borne  $\text{D}^b\text{NP}_{396}^+$  and  $\text{D}^b\text{GP}_{33}^+ \text{CD8}^+ \text{T}_M$  (left plot) were quantified in contemporaneous analyses of aging LCMV-immune mice by determining their respective GMFI values (geometric mean of fluorescent intensity); the overlaid histograms depict representative CD124 and CD126 expression by young (gray) and aged (black tracing)  $\text{D}^b\text{NP}_{396}^+$  (middle) and  $\text{D}^b\text{GP}_{33}^+$  (right)  $\text{CD8}^+ \text{T}_M$ . **B.**, left plots: temporal regulation of CD124, CD126 and TGF $\beta$ RII expression by aging  $\text{D}^b\text{NP}_{396}^+ \text{CD8}^+ \text{T}_M$  (triangle symbol: naïve  $\text{CD44}^{\text{lo}} \text{CD8}^+ \text{T}_N$ ; the gray bar demarcates the period from peak  $\text{I}^0 \text{CD8}^+ \text{T}_E$  expansion [d8] to initial establishment of  $\text{CD8}^+ \text{T}$  cell memory [d42], and asterisks indicate statistical significance comparing young and older  $\text{D}^b\text{NP}_{396}^+ \text{CD8}^+ \text{T}_M$  using one-way ANOVA with Dunnett’s multiple comparisons test). Right plots: STAT phosphorylation by young (gray) and old (black) p14  $\text{T}_M$  was assessed directly *ex vivo* and after 15min *in vitro* culture in the presence of graded dosages of recombinant IL-4 (top), IL-6 (middle) or IL-10 (bottom); the top panel also includes an analysis of naïve p14  $\text{T}_N$  (white). **C.**,  $\text{II}^0 \text{CD8}^+ \text{T}_E$  expansions in B6,  $\text{B6.IL-4}^{-/-}$  and  $\text{B6.IL-6}^{-/-}$  mice after mixed AT/RC Arm. **D.**, similar experiments as in panel B but performed with LCMV cl13. **E.**,  $\text{II}^0 \text{CD8}^+ \text{T}_E$  expansions under conditions of TGF $\beta$  blockade. The gray and black arrows/values in panel C indicate the extent of significantly reduced (asterisks)  $\text{II}^0 \text{CD8}^+ \text{T}_E$  expansions comparing young  $\text{II}^0 \text{CD8}^+ \text{T}_E$  in B6 and  $\text{B6.IL-4}^{-/-}$  mice (gray), as well as old  $\text{II}^0 \text{CD8}^+ \text{T}_E$  in B6 and  $\text{B6.IL-4}^{-/-}$  mice (black) ( $n \geq 3$  mice/group; AT of  $2 \times 10^3$  [panel C & E top],  $10 \times 10^3$  [panel D top/middle] or  $5 \times 10^3$  [panel D bottom & E bottom] young and old  $\text{D}^b\text{NP}_{396}^+ \text{CD8}^+ \text{T}_M$  each).



**Figure 3. Role of IFN $\gamma$ , IFN $\gamma$  receptor and FasL in the regulation of young and old CD8 $^{+}$ T $_M$  recall activity.** **A.**, left: expression of CD119 by aging D $^{b}$ NP $_{396}^{+}$ CD8 $^{+}$ T $_M$  in the PBMC compartment. Right: STAT1 phosphorylation by young and aged p14 T $_M$  was determined *ex vivo* and after 15min *in vitro* exposure to recombinant IFN $\gamma$ ; note the slightly enhanced *ex vivo* pSTAT1 levels in old vs. young p14 T $_M$ . **B.**, mixed AT/RC Arm experiments were performed with B6 and B6.IFN $\gamma^{-/-}$  recipients as well as under conditions of control (rat IgG) or aIFN $\gamma$  treatment. **C.**, similar IFN $\gamma$  blocking experiments as in panel B but conducted with the chronic LCMV cl13 model. **D.**, II $^o$  CD8 $^{+}$ T $_E$  expansions after AT/RC Arm (top) or AT/RC cl13 (bottom) using B6 vs. B6.lpr recipients. Arrows/values in panel B-D indicate the respective extent and significance (asterisks) by which antibody treatment or immunodeficiency reduced II $^o$  expansions of young (gray) or old (black) II $^o$  CD8 $^{+}$ T $_E$  populations ( $n \geq 3$  mice/group or time point; AT of  $3 \times 10^3$  [panel B],  $10 \times 10^3$  [panel C],  $2 \times 10^3$  [panel D top] or  $5 \times 10^3$  [panel D bottom] young and old D $^{b}$ NP $_{396}^{+}$ CD8 $^{+}$ T $_M$  each).

**Figure 4. CD11a and CXCR3 blockade preferentially restrict II $^o$  expansions of aged antiviral CD8 $^{+}$ T $_M$ .** **A.**, time series GSEA were conducted for *ex vivo* purified aging p14 T $_M$  (d46, d156, d286 and d400) as detailed in refs. [9, 10]. Top: old p14 T $_M$  are depleted for genes within the KEGG CAMs pathway module (NES: -1.82;  $p=0.0078$ ). Bottom: heat map displaying relative expression of individual genes by aging p14 T $_M$  (blue: low, red: high). The right hand column summarizes corresponding protein expression by aging splenic or blood-borne D $^{b}$ NP $_{396}^{+}$  and/or D $^{b}$ GP $_{33}^{+}$ CD8 $^{+}$ T $_M$  retrieved from LCMV-immune B6 mice; colors indicate significant expression changes accrued over time (red: upregulation; black: no change; green: downregulation) and the primary protein expression data in this summary is detailed in panel B as well as **Figs.5A, S2** and/or refs. [9, 10]. **B.**, temporal regulation of CD11a and CD54 expression by D $^{b}$ NP $_{396}^{+}$ CD8 $^{+}$ T $_E/M$  (triangle symbol: CD44 $^{lo}$  CD8 $^{+}$ T $_N$ ). **C.**, mixed AT/RC Arm and cl13 experiments were performed with rat IgG (control) or aCD11a blocking antibodies; due to the efficacy and prolonged half-life of the KBA antibody, antibodies were only injected on d0 and d2. **D.**, temporal regulation of CXCR3 expression by aging blood-borne D $^{b}$ NP $_{396}^{+}$ CD8 $^{+}$ T $_M$  (dot plots gated on CD8 $^{+}$ T cells). **E.**, II $^o$  CD8 $^{+}$ T $_E$  expansions in different tissues as assessed after LCMV Arm infection and control (hamster Ig) vs.  $\alpha$ CXCR3 treatment. Note the preferential decrease of aged II $^o$  CD8 $^{+}$ T $_E$  expansions in the wake of CD11a or CXCR3 blockade as indicated by black and gray arrows/values (panel C & E) ( $n \geq 3$  mice/group or time point; AT of  $5 \times 10^3$  [panel C top & E] or  $8 \times 10^3$  [panel C middle/bottom] young and old D $^{b}$ NP $_{396}^{+}$ CD8 $^{+}$ T $_M$  each).

**Figure 5. CD28:CD80/86 but not CD27:CD70 or CD40L:CD40 co-stimulatory interactions preferentially promote improved II $^o$  reactivity of aged antiviral CD8 $^{+}$ T $_M$ .** **A.**, temporal regulation of CD27 and CD28 expression by aging D $^{b}$ NP $_{396}^{+}$ CD8 $^{+}$ T $_M$  in peripheral blood (triangle symbol: CD44 $^{lo}$ CD8 $^{+}$ T $_N$ ). **B.**, mixed AT/RC experiments were conducted in the LCMV Arm and cl13 systems as indicated using treatment with rat IgG (control) or CD70 blocking antibodies. **C.**, II $^o$  CD8 $^{+}$ T $_E$  expansions after mixed AT/RC Arm performed under conditions of CD40L or CD28 blockade. **D.**, same experiment as in C but depicting total splenic II $^o$  CD8 $^{+}$ T $_E$  numbers accumulated in the absence vs. presence of CD28 blockade. **E.**, mixed AT/RC experiments with CD80/86 $^{-/-}$  recipients employing LCMV Arm (top) or cl13 (middle/bottom) infection



protocols. The gray and black arrows/values in panels C-D emphasize the extent of reduced  $\text{II}^{\circ} \text{CD8}^{+}\text{T}_{\text{E}}$  expansions comparing young  $\text{II}^{\circ} \text{CD8}^{+}\text{T}_{\text{E}}$  populations of control and antibody treated mice (gray), and old  $\text{II}^{\circ} \text{CD8}^{+}\text{T}_{\text{E}}$  populations of control and antibody treated mice (black); adjacent asterisks indicate statistical significance ( $n \geq 3$  mice/group or time point; AT of  $2 \times 10^3$  [panel B top, C, D & E top],  $8 \times 10^3$  [panel B middle/bottom & F] or  $10 \times 10^3$  [panel E middle/bottom] young and old  $\text{D}^{\text{b}}\text{NP}_{396}^{+}\text{CD8}^{+}\text{T}_{\text{M}}$  each).

**Figure 6. Enforced SAP expression constrains  $\text{II}^{\circ}$  reactivity of  $\text{CD8}^{+}\text{T}_{\text{M}}$ .** **A.**, proliferation of young and old  $\text{II}^{\circ} \text{p14 T}_{\text{E}}$  as determined by CFSE dilution *in vivo* (64h after AT/RC Arm with  $10^6 \text{p14 T}_{\text{M}}$ ) and *in vitro* (PBMC containing equal numbers of  $\text{p14 T}_{\text{M}}$  cultured for 72h with  $\text{GP}_{33-41}$  peptide-coated APCs). The adjacent diagrams depict *in vitro* proliferation indices, absolute numbers of  $\text{p14 T}$  cells at start (d0) and end (d3) of culture, and SAP expression as a function of cell division. **B.**, flow chart for construction of retrogenic  $\text{p14}$  chimeras including 1.5h *in vitro* spinfection with pMiG-empty (control) or pMiG-SAP (experimental) retroviruses. **C.**, total SAP content of  $\text{I}^{\circ} \text{p14 T}_{\text{E}}$  (d8) comparing control and experimental  $\text{p14}$  chimeras as well as transduced ( $\text{GFP}^{+}$ ) and untransduced ( $\text{GFP}^{-}$ ) subsets. **D.**, experimental flow chart:  $\text{GFP}^{+} \text{p14 T}_{\text{M}}$  (d89) were FACS-purified from control and experimental  $\text{p14}$  chimeras and transferred into B6 mice ( $2 \times 10^3/\text{recipient}$ ) that were then challenged with LCMV Arm and analyzed 6-8 days later. **E.**,  $\text{II}^{\circ} \text{p14 T}_{\text{E}}$  expansions in peripheral blood (d6); dot plots gated on all PBMC, note that GFP expression is restricted to the transferred congenic  $\text{CD90.1}^{+}\text{p14 T}$  cells. **F.**, summary of  $\text{II}^{\circ} \text{p14 T}_{\text{E}}$  expansions in blood (d6) and spleen (d8);  $n \geq 3$  mice/group.

**Figure S1. Gene set enrichment analysis (GSEA) of aging  $\text{p14 T}_{\text{M}}$ : the JAK-STAT signaling pathway.**

Time series GSEA were conducted with data sets obtained for aging  $\text{p14 T}_{\text{M}}$  (d46, d156, d286 and d400) purified from LCMV-challenged  $\text{p14}$  chimeras and processed directly ex vivo for microarray hybridization as detailed in refs. [9, 10]. Top: aged  $\text{p14 T}_{\text{M}}$  are enriched for genes within the KEGG JAK-STAT signaling pathway module (normalized enrichment score: 1.05). Bottom: heat map displaying relative expression of individual genes by aging  $\text{p14 T}_{\text{M}}$  (blue: low, red: high). The right hand column summarizes corresponding protein expression patterns conducted with aging  $\text{D}^{\text{b}}\text{NP}_{396}^{+}$  and/or  $\text{D}^{\text{b}}\text{GP}_{33}^{+} \text{CD8}^{+}\text{T}_{\text{M}}$  retrieved from spleen or blood of LCMV-immune B6 mice; colors identify significant expression changes accrued over time (red: upregulation; black: no change; green: downregulation); where indicated in parenthesis,  $\text{CD8}^{+}\text{T}_{\text{M}}$  were stimulated *in vitro* prior to analysis ( $\text{IFN}\gamma$ : 5h TCR stimulation with peptide; phosphorylated STAT proteins: 15min stimulation with indicated cytokines). The primary protein expression data in this summary are shown in **Figs. 2A/B, 3A, S2** and/or refs. [9, 10].

**Figure S2. Temporal regulation of selected  $\text{CD8}^{+}\text{T}_{\text{M}}$ -expressed cell surface receptors/ligands.**

PBMC obtained from cohorts of aging LCMV-immune mice were contemporaneously stained to quantify expression levels of indicated receptors/ligands by  $\text{D}^{\text{b}}\text{GP}_{33}^{+} \text{CD8}^{+}\text{T}_{\text{M}}$  (GMFI: geometric mean of fluorescence intensity;  $n \geq 3$  mice per time point; statistical differences between young and older  $\text{CD8}^{+}\text{T}_{\text{M}}$  were calculated using one-way ANOVA with Dunnett's multiple comparisons test).

# REFERENCES

1. Sallusto F, Geginat J, Lanzavecchia A. Central memory and effector memory T cell subsets: function, generation, and maintenance. *Annu Rev Immunol.* 2004;22:745-63. PubMed PMID: 15032595.
2. Harty JT, Badovinac VP. Shaping and reshaping CD8+ T-cell memory. *Nat Rev Immunol.* 2008;8(2):107-19. Epub 2008/01/26. doi: nri2251 [pii] 10.1038/nri2251. PubMed PMID: 18219309.
3. Mueller SN, Gebhardt T, Carbone FR, Heath WR. Memory T cell subsets, migration patterns, and tissue residence. *Annu Rev Immunol.* 2013;31:137-61. doi: 10.1146/annurev-immunol-032712-095954. PubMed PMID: 23215646.
4. Crotty S, Kaech SM, Schoenberger SP. Immunologic memory. In: Paul WE, editor. *Fundamental Immunology*. 7th ed. ed. Philadelphia, PA: Lippincott Williams & Wilkins; 2013. p. 741-64.
5. Roberts AD, Ely KH, Woodland DL. Differential contributions of central and effector memory T cells to recall responses. *J Exp Med.* 2005;202(1):123-33. PubMed PMID: 15983064.
6. Klinger A, Gebert A, Bieber K, Kalies K, Ager A, Bell EB, et al. Cyclical expression of L-selectin (CD62L) by recirculating T cells. *Int Immunol.* 2009;21(4):443-55. doi: 10.1093/intimm/dxp012. PubMed PMID: 19240088.
7. Rutishauser RL, Kaech SM. Generating diversity: transcriptional regulation of effector and memory CD8 T-cell differentiation. *Immunol Rev.* 2010;235(1):219-33. doi: 10.1111/j.0105-2896.2010.00901.x. PubMed PMID: 20536566.
8. Martin MD, Kim MT, Shan Q, Sompallae R, Xue HH, Harty JT, et al. Phenotypic and Functional Alterations in Circulating Memory CD8 T Cells with Time after Primary Infection. *PLoS Pathog.* 2015;11(10):e1005219. doi: 10.1371/journal.ppat.1005219. PubMed PMID: 26485703; PubMed Central PMCID: PMC4618693.
9. Eberlein J, Davenport B, Nguyen TT, Victorino F, Karimpour-Fard A, Hunter LE, et al. Aging promotes acquisition of naïve-like CD8+ memory T cell traits and enhanced functionalities. *J Clin Invest.* 2016;106(10):3942-60. Epub September 12, 2016 doi: 10.1172/JCI88546.
10. Davenport B, Eberlein J, van der Heide V, Jhun K, Nguyen TT, Victorino F, et al. Aging of antiviral CD8+ memory T cells fosters increased survival, metabolic adaptations and lymphoid tissue homing. Manuscript submitted. 2018; bioRxiv <https://doi.org/10.1101/191932>.
11. Graef P, Buchholz VR, Stemmerger C, Flossdorf M, Henkel L, Schiemann M, et al. Serial transfer of single-cell-derived immunocompetence reveals stemness of CD8(+) central memory T cells. *Immunity.* 2014;41(1):116-26. doi: 10.1016/j.immuni.2014.05.018. PubMed PMID: 25035956.
12. Stemmerger C, Graef P, Odendahl M, Albrecht J, Dossinger G, Anderl F, et al. Lowest numbers of primary CD8(+) T cells can reconstitute protective immunity upon adoptive immunotherapy. *Blood.* 2014;124(4):628-37. doi: 10.1182/blood-2013-12-547349. PubMed PMID: 24855206.
13. Nolz JC, Harty JT. Protective capacity of memory CD8+ T cells is dictated by antigen exposure history and nature of the infection. *Immunity.* 2011;34(5):781-93. Epub 2011/05/10. doi: S1074-7613(11)00174-9 [pii] 10.1016/j.immuni.2011.03.020. PubMed PMID: 21549619; PubMed Central PMCID: PMC3103642.
14. Boyman O, Krieg C, Homann D, Sprent J. Homeostatic maintenance of T cells and natural killer cells. *Cell Mol Life Sci.* 2012;69(10):1597-608. doi: 10.1007/s00018-012-0968-7. PubMed PMID: 22460580.
15. Mackall CL, Fry TJ, Gress RE. Harnessing the biology of IL-7 for therapeutic application. *Nat Rev Immunol.* 2011;11(5):330-42. Epub 2011/04/22. doi: nri2970 [pii] 10.1038/nri2970. PubMed PMID: 21508983.

16. Kim MT, Harty JT. Impact of Inflammatory Cytokines on Effector and Memory CD8+ T Cells. *Frontiers in immunology*. 2014;5:295. doi: 10.3389/fimmu.2014.00295. PubMed PMID: 24995011; PubMed Central PMCID: PMC4062963.
17. Mitchell DM, Williams MA. Disparate roles for STAT5 in primary and secondary CTL responses. *J Immunol*. 2013;190(7):3390-8. doi: 10.4049/jimmunol.1202674. PubMed PMID: 23440411; PubMed Central PMCID: PMC3608757.
18. Pandey A, Ozaki K, Baumann H, Levin SD, Puel A, Farr AG, et al. Cloning of a receptor subunit required for signaling by thymic stromal lymphopoietin. *Nat Immunol*. 2000;1(1):59-64. PubMed PMID: 10881176.
19. Brown VI, Hulitt J, Fish J, Sheen C, Bruno M, Xu Q, et al. Thymic stromal-derived lymphopoietin induces proliferation of pre-B leukemia and antagonizes mTOR inhibitors, suggesting a role for interleukin-7Ralpha signaling. *Cancer Res*. 2007;67(20):9963-70. doi: 10.1158/0008-5472.CAN-06-4704. PubMed PMID: 17942929.
20. Tinoco R, Alcalde V, Yang Y, Sauer K, Zuniga EI. Cell-intrinsic transforming growth factor-beta signaling mediates virus-specific CD8+ T cell deletion and viral persistence in vivo. *Immunity*. 2009;31(1):145-57. Epub 2009/07/17. doi: S1074-7613(09)00288-X [pii] 10.1016/j.immuni.2009.06.015. PubMed PMID: 19604493; PubMed Central PMCID: PMC3039716.
21. Harker JA, Lewis GM, Mack L, Zuniga EI. Late interleukin-6 escalates T follicular helper cell responses and controls a chronic viral infection. *Science*. 2011;334(6057):825-9. Epub 2011/10/01. doi: science.1208421 [pii] 10.1126/science.1208421. PubMed PMID: 21960530.
22. Lee A, Park SP, Park CH, Kang BH, Park SH, Ha SJ, et al. IL-4 Induced Innate CD8+ T Cells Control Persistent Viral Infection. *PLoS Pathog*. 2015;11(10):e1005193. doi: 10.1371/journal.ppat.1005193. PubMed PMID: 26452143; PubMed Central PMCID: PMCPMC4599894.
23. White JT, Cross EW, Kedl RM. Antigen-inexperienced memory CD8+ T cells: where they come from and why we need them. *Nat Rev Immunol*. 2017;17(6):391-400. doi: 10.1038/nri.2017.34. PubMed PMID: 28480897; PubMed Central PMCID: PMCPMC5569888.
24. Bonilla WV, Frohlich A, Senn K, Kallert S, Fernandez M, Johnson S, et al. The alarmin interleukin-33 drives protective antiviral CD8(+) T cell responses. *Science*. 2012;335(6071):984-9. doi: 10.1126/science.1215418. PubMed PMID: 22323740.
25. Garidou L, Heydari S, Gossa S, McGavern DB. Therapeutic blockade of transforming growth factor beta fails to promote clearance of a persistent viral infection. *J Virol*. 2012;86(13):7060-71. doi: 10.1128/JVI.00164-12. PubMed PMID: 22553324; PubMed Central PMCID: PMC3416327.
26. Boettler T, Cheng Y, Ehrhardt K, von Herrath M. TGF-beta blockade does not improve control of an established persistent viral infection. *Viral Immunol*. 2012;25(3):232-8. doi: 10.1089/vim.2011.0079. PubMed PMID: 22620718; PubMed Central PMCID: PMC3366339.
27. Wherry EJ, Teichgraber V, Becker TC, Masopust D, Kaech SM, Antia R, et al. Lineage relationship and protective immunity of memory CD8 T cell subsets. *Nat Immunol*. 2003;4(3):225-34. PubMed PMID: 12563257.
28. Feau S, Arens R, Togher S, Schoenberger SP. Autocrine IL-2 is required for secondary population expansion of CD8(+) memory T cells. *Nat Immunol*. 2011;12(9):908-13. Epub 2011/08/02. doi: ni.2079 [pii] 10.1038/ni.2079. PubMed PMID: 21804558; PubMed Central PMCID: PMC3388550.
29. Whitmire JK, Tan JT, Whitton JL. Interferon-gamma acts directly on CD8+ T cells to increase their abundance during virus infection. *J Exp Med*. 2005;201(7):1053-9. PubMed PMID: 15809350.
30. Balkow S, Kersten A, Tran TT, Stehle T, Grosse P, Museteanu C, et al. Concerted action of the FasL/Fas and perforin/granzyme A and B pathways is mandatory for the development of early viral

hepatitis but not for recovery from viral infection. *J Virol.* 2001;75(18):8781-91. Epub 2001/08/17. PubMed PMID: 11507223; PubMed Central PMCID: PMC115123.

31. Rode M, Balkow S, Sobek V, Brehm R, Martin P, Kersten A, et al. Perforin and Fas act together in the induction of apoptosis, and both are critical in the clearance of lymphocytic choriomeningitis virus infection. *J Virol.* 2004;78(22):12395-405. Epub 2004/10/28. doi: 78/22/12395 [pii] 10.1128/JVI.78.22.12395-12405.2004. PubMed PMID: 15507626; PubMed Central PMCID: PMC525048.
32. Weant AE, Michalek RD, Khan IU, Holbrook BC, Willingham MC, Grayson JM. Apoptosis regulators Bim and Fas function concurrently to control autoimmunity and CD8+ T cell contraction. *Immunity.* 2008;28(2):218-30. Epub 2008/02/16. doi: S1074-7613(08)00034-4 [pii] 10.1016/j.immuni.2007.12.014. PubMed PMID: 18275832.
33. Hughes PD, Belz GT, Fortner KA, Budd RC, Strasser A, Bouillet P. Apoptosis regulators Fas and Bim cooperate in shutdown of chronic immune responses and prevention of autoimmunity. *Immunity.* 2008;28(2):197-205. Epub 2008/02/16. doi: S1074-7613(08)00037-X [pii] 10.1016/j.immuni.2007.12.017. PubMed PMID: 18275830; PubMed Central PMCID: PMC2270348.
34. Klebanoff CA, Scott CD, Leonardi AJ, Yamamoto TN, Cruz AC, Ouyang C, et al. Memory T cell-driven differentiation of naive cells impairs adoptive immunotherapy. *J Clin Invest.* 2016;126(1):318-34. doi: 10.1172/JCI81217. PubMed PMID: 26657860; PubMed Central PMCID: PMC4701537.
35. Hallermalm K, De Geer A, Kiessling R, Levitsky V, Levitskaya J. Autocrine secretion of Fas ligand shields tumor cells from Fas-mediated killing by cytotoxic lymphocytes. *Cancer Res.* 2004;64(18):6775-82. doi: 10.1158/0008-5472.CAN-04-0508. PubMed PMID: 15374996.
36. Rai D, Pham NL, Harty JT, Badovinac VP. Tracking the total CD8 T cell response to infection reveals substantial discordance in magnitude and kinetics between inbred and outbred hosts. *J Immunol.* 2009;183(12):7672-81. Epub 2009/11/26. doi: jimmunol.0902874 [pii] 10.4049/jimmunol.0902874. PubMed PMID: 19933864; PubMed Central PMCID: PMC2808048.
37. Hogg N, Patzak I, Willenbrock F. The insider's guide to leukocyte integrin signalling and function. *Nat Rev Immunol.* 2011;11(6):416-26. doi: 10.1038/nri2986. PubMed PMID: 21597477.
38. Berlin-Rufenach C, Otto F, Mathies M, Westermann J, Owen MJ, Hamann A, et al. Lymphocyte migration in lymphocyte function-associated antigen (LFA)-1-deficient mice. *J Exp Med.* 1999;189(9):1467-78. PubMed PMID: 10224287; PubMed Central PMCID: PMC2193056.
39. Bose TO, Pham QM, Jellison ER, Mouries J, Ballantyne CM, Lefrancois L. CD11a regulates effector CD8 T cell differentiation and central memory development in response to infection with *Listeria monocytogenes*. *Infect Immun.* 2013;81(4):1140-51. doi: 10.1128/IAI.00749-12. PubMed PMID: 23357382; PubMed Central PMCID: PMC3639604.
40. Gerard A, Khan O, Beemiller P, Oswald E, Hu J, Matloubian M, et al. Secondary T cell-T cell synaptic interactions drive the differentiation of protective CD8+ T cells. *Nat Immunol.* 2013;14(4):356-63. doi: 10.1038/ni.2547. PubMed PMID: 23475183.
41. Ford ML, Adams AB, Pearson TC. Targeting co-stimulatory pathways: transplantation and autoimmunity. *Nature reviews Nephrology.* 2014;10(1):14-24. doi: 10.1038/nrneph.2013.183. PubMed PMID: 24100403.
42. Krummey SM, Ford ML. Heterogeneity within T Cell Memory: Implications for Transplant Tolerance. *Frontiers in immunology.* 2012;3:36. doi: 10.3389/fimmu.2012.00036. PubMed PMID: 22566919; PubMed Central PMCID: PMC3342058.

43. Griffith JW, Sokol CL, Luster AD. Chemokines and chemokine receptors: positioning cells for host defense and immunity. *Annu Rev Immunol.* 2014;32:659-702. doi: 10.1146/annurev-immunol-032713-120145. PubMed PMID: 24655300.
44. Guarda G, Hons M, Soriano SF, Huang AY, Polley R, Martin-Fontecha A, et al. L-selectin-negative CCR7- effector and memory CD8+ T cells enter reactive lymph nodes and kill dendritic cells. *Nat Immunol.* 2007;8(7):743-52. PubMed PMID: 17529983.
45. Hu JK, Kagari T, Clingan JM, Matloubian M. Expression of chemokine receptor CXCR3 on T cells affects the balance between effector and memory CD8 T-cell generation. *Proc Natl Acad Sci U S A.* 2011;108(21):E118-27. Epub 2011/04/27. doi: 1101881108 [pii] 10.1073/pnas.1101881108. PubMed PMID: 21518913; PubMed Central PMCID: PMC3102421.
46. Kurachi M, Kurachi J, Suenaga F, Tsukui T, Abe J, Ueha S, et al. Chemokine receptor CXCR3 facilitates CD8(+) T cell differentiation into short-lived effector cells leading to memory degeneration. *J Exp Med.* 2011;208(8):1605-20. Epub 2011/07/27. doi: jem.20102101 [pii] 10.1084/jem.20102101. PubMed PMID: 21788406; PubMed Central PMCID: PMC3149224.
47. Kohlmeier JE, Reiley WW, Perona-Wright G, Freeman ML, Yager EJ, Connor LM, et al. Inflammatory chemokine receptors regulate CD8(+) T cell contraction and memory generation following infection. *J Exp Med.* 2011;208(8):1621-34. Epub 2011/07/27. doi: jem.20102110 [pii] 10.1084/jem.20102110. PubMed PMID: 21788409; PubMed Central PMCID: PMC3149221.
48. Sung JH, Zhang H, Moseman EA, Alvarez D, Iannaccone M, Henrickson SE, et al. Chemokine guidance of central memory T cells is critical for antiviral recall responses in lymph nodes. *Cell.* 2012;150(6):1249-63. doi: 10.1016/j.cell.2012.08.015. PubMed PMID: 22980984; PubMed Central PMCID: PMC3445043.
49. Hikono H, Kohlmeier JE, Takamura S, Wittmer ST, Roberts AD, Woodland DL. Activation phenotype, rather than central- or effector-memory phenotype, predicts the recall efficacy of memory CD8+ T cells. *J Exp Med.* 2007;204(7):1625-36. PubMed PMID: 17606632.
50. Uppaluri R, Sheehan KC, Wang L, Bui JD, Brotman JJ, Lu B, et al. Prolongation of cardiac and islet allograft survival by a blocking hamster anti-mouse CXCR3 monoclonal antibody. *Transplantation.* 2008;86(1):137-47. doi: 10.1097/TP.0b013e31817b8e4b. PubMed PMID: 18622291; PubMed Central PMCID: PMC3140461.
51. van der Heide V, Homann D. CD28 days later: Resurrecting costimulation for CD8(+) memory T cells. *Eur J Immunol.* 2016;46(7):1587-91. doi: 10.1002/eji.201646500. PubMed PMID: 27401871.
52. Wortzman ME, Clouthier DL, McPherson AJ, Lin GH, Watts TH. The contextual role of TNFR family members in CD8(+) T-cell control of viral infections. *Immunol Rev.* 2013;255(1):125-48. doi: 10.1111/imr.12086. PubMed PMID: 23947352.
53. Schildknecht A, Miescher I, Yagita H, van den Broek M. Priming of CD8+ T cell responses by pathogens typically depends on CD70-mediated interactions with dendritic cells. *Eur J Immunol.* 2007;37(3):716-28. doi: 10.1002/eji.200636824. PubMed PMID: 17295392.
54. Penaloza-MacMaster P, Ur Rasheed A, Iyer SS, Yagita H, Blazar BR, Ahmed R. Opposing effects of CD70 costimulation during acute and chronic lymphocytic choriomeningitis virus infection of mice. *J Virol.* 2011;85(13):6168-74. doi: 10.1128/JVI.02205-10. PubMed PMID: 21507976; PubMed Central PMCID: PMC3126534.
55. Munitic I, Kuka M, Allam A, Scoville JP, Ashwell JD. CD70 deficiency impairs effector CD8 T cell generation and viral clearance but is dispensable for the recall response to lymphocytic choriomeningitis virus. *J Immunol.* 2013;190(3):1169-79. doi: 10.4049/jimmunol.1202353. PubMed PMID: 23269247; PubMed Central PMCID: PMC3552005.



56. Matter MS, Claus C, Ochsenbein AF. CD4+ T cell help improves CD8+ T cell memory by retained CD27 expression. *Eur J Immunol.* 2008;38(7):1847-56. doi: 10.1002/eji.200737824. PubMed PMID: 18506879.
57. Grujic M, Bartholdy C, Remy M, Pinschewer DD, Christensen JP, Thomsen AR. The role of CD80/CD86 in generation and maintenance of functional virus-specific CD8+ T cells in mice infected with lymphocytic choriomeningitis virus. *J Immunol.* 2010;185(3):1730-43. Epub 2010/07/06. doi: jimmunol.0903894 [pii] 10.4049/jimmunol.0903894. PubMed PMID: 20601595.
58. Eberlein J, Davenport B, Nguyen TT, Victorino F, Sparwasser T, Homann D. Multiple Layers of CD80/86-Dependent Costimulatory Activity Regulate Primary, Memory, and Secondary Lymphocytic Choriomeningitis Virus-Specific T Cell Immunity. *J Virol.* 2012;86(4):1955-70. Epub 2011/12/14. doi: JVI.05949-11 [pii] 10.1128/JVI.05949-11. PubMed PMID: 22156513.
59. Suresh M, Whitmire JK, Harrington LE, Larsen CP, Pearson TC, Altman JD, et al. Role of CD28-B7 interactions in generation and maintenance of CD8 T cell memory. *J Immunol.* 2001;167(10):5565-73. PubMed PMID: 11698427.
60. Durlanik S, Loyal L, Stark R, Sercan Alp O, Hartung A, Radbruch A, et al. CD40L expression by CD4+ but not CD8+ T cells regulates antiviral immune responses in acute LCMV infection in mice. *Eur J Immunol.* 2016;46(11):2566-73. doi: 10.1002/eji.201646420. PubMed PMID: 27562840.
61. Frentsch M, Stark R, Matzmohr N, Meier S, Durlanik S, Schulz AR, et al. CD40L expression permits CD8+ T cells to execute immunologic helper functions. *Blood.* 2013;122(3):405-12. doi: 10.1182/blood-2013-02-483586. PubMed PMID: 23719298.
62. Shugart JA, Bambina S, Alice AF, Montler R, Bahjat KS. A self-help program for memory CD8+ T cells: positive feedback via CD40-CD40L signaling as a critical determinant of secondary expansion. *PLoS One.* 2013;8(5):e64878. doi: 10.1371/journal.pone.0064878. PubMed PMID: 23717671; PubMed Central PMCID: PMC3662717.
63. Homann D, Jahreis A, Wolfe T, Hughes A, Coon B, van Stipdonk MJ, et al. CD40L blockade prevents autoimmune diabetes by induction of bitypic NK/DC regulatory cells. *Immunity.* 2002;16(3):403-15. PubMed PMID: 11911825.
64. West EE, Youngblood B, Tan WG, Jin HT, Araki K, Alexe G, et al. Tight Regulation of Memory CD8(+) T Cells Limits Their Effectiveness during Sustained High Viral Load. *Immunity.* 2011;35(2):285-98. Epub 2011/08/23. doi: S1074-7613(11)00305-0 [pii] 10.1016/j.immuni.2011.05.017. PubMed PMID: 21856186.
65. Marzo AL, Vezys V, Klonowski KD, Lee SJ, Muralimohan G, Moore M, et al. Fully functional memory CD8 T cells in the absence of CD4 T cells. *J Immunol.* 2004;173(2):969-75. PubMed PMID: 15240684.
66. Veillette A, Dong Z, Latour S. Consequence of the SLAM-SAP signaling pathway in innate-like and conventional lymphocytes. *Immunity.* 2007;27(5):698-710. Epub 2007/11/23. doi: S1074-7613(07)00501-8 [pii] 10.1016/j.immuni.2007.11.005. PubMed PMID: 18031694.
67. Chen G, Tai AK, Lin M, Chang F, Terhorst C, Huber BT. Increased proliferation of CD8+ T cells in SAP-deficient mice is associated with impaired activation-induced cell death. *Eur J Immunol.* 2007;37(3):663-74. Epub 2007/02/03. doi: 10.1002/eji.200636417. PubMed PMID: 17266174.
68. Chlewicki LK, Velikovsky CA, Balakrishnan V, Mariuzza RA, Kumar V. Molecular basis of the dual functions of 2B4 (CD244). *J Immunol.* 2008;180(12):8159-67. PubMed PMID: 18523281.
69. Waggoner SN, Kumar V. Evolving role of 2B4/CD244 in T and NK cell responses during virus infection. *Frontiers in immunology.* 2012;3:377. doi: 10.3389/fimmu.2012.00377. PubMed PMID: 23248626; PubMed Central PMCID: PMC3518765.
70. Waggoner SN, Taniguchi RT, Mathew PA, Kumar V, Welsh RM. Absence of mouse 2B4 promotes NK cell-mediated killing of activated CD8+ T cells, leading to prolonged viral persistence and altered

- pathogenesis. *J Clin Invest.* 2010;120(6):1925-38. doi: 10.1172/JCI41264. PubMed PMID: 20440077; PubMed Central PMCID: PMC2877945.
71. Guo H, Cranert SA, Lu Y, Zhong MC, Zhang S, Chen J, et al. Deletion of Slam locus in mice reveals inhibitory role of SLAM family in NK cell responses regulated by cytokines and LFA-1. *J Exp Med.* 2016;213(10):2187-207. doi: 10.1084/jem.20160552. PubMed PMID: 27573813; PubMed Central PMCID: PMCPMC5030809.
72. Pulendran B, Ahmed R. Immunological mechanisms of vaccination. *Nat Immunol.* 2011;12(6):509-17. PubMed PMID: 21739679; PubMed Central PMCID: PMC3253344.
73. Wherry EJ, Kurachi M. Molecular and cellular insights into T cell exhaustion. *Nat Rev Immunol.* 2015;15(8):486-99. doi: 10.1038/nri3862. PubMed PMID: 26205583; PubMed Central PMCID: PMCPMC4889009.
74. Kahan SM, Wherry EJ, Zajac AJ. T cell exhaustion during persistent viral infections. *Virology.* 2015. doi: 10.1016/j.virol.2014.12.033. PubMed PMID: 25620767.
75. Badovinac VP, Porter BB, Harty JT. CD8+ T cell contraction is controlled by early inflammation. *Nat Immunol.* 2004;5(8):809-17. PubMed PMID: 15247915.
76. Schroder K, Hertzog PJ, Ravasi T, Hume DA. Interferon-gamma: an overview of signals, mechanisms and functions. *J Leukoc Biol.* 2004;75(2):163-89. doi: 10.1189/jlb.0603252. PubMed PMID: 14525967.
77. Homann D, Tishon A, Berger DP, Weigle WO, von Herrath MG, Oldstone MB. Evidence for an underlying CD4 helper and CD8 T-cell defect in B-cell-deficient mice: failure to clear persistent virus infection after adoptive immunotherapy with virus-specific memory cells from muMT/muMT mice. *J Virol.* 1998;72(11):9208-16. PubMed PMID: 9765468.
78. Lenz DC, Kurz SK, Lemmens E, Schoenberger SP, Sprent J, Oldstone MB, et al. IL-7 regulates basal homeostatic proliferation of antiviral CD4+T cell memory. *Proc Natl Acad Sci U S A.* 2004;101(25):9357-62. PubMed PMID: 15197277.
79. Eberlein J, Nguyen TT, Victorino F, Golden-Mason L, Rosen HR, Homann D. Comprehensive assessment of chemokine expression profiles by flow cytometry. *J Clin Invest.* 2010;120(3):907-23. Epub 2010/03/04. doi: 40645 [pii] 10.1172/JCI40645. PubMed PMID: 20197626; PubMed Central PMCID: PMC2827956.
80. Hildemann SK, Eberlein J, Davenport B, Nguyen TT, Victorino F, Homann D. High efficiency of antiviral CD4(+) killer T cells. *PLoS One.* 2013;8(4):e60420. doi: 10.1371/journal.pone.0060420. PubMed PMID: 23565245; PubMed Central PMCID: PMC3614903.

**Figure 1**

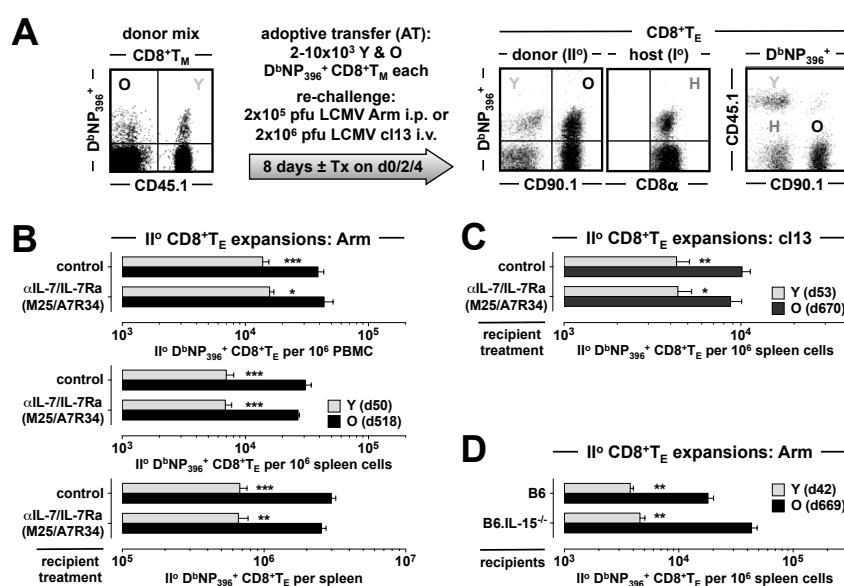



**Figure 2**

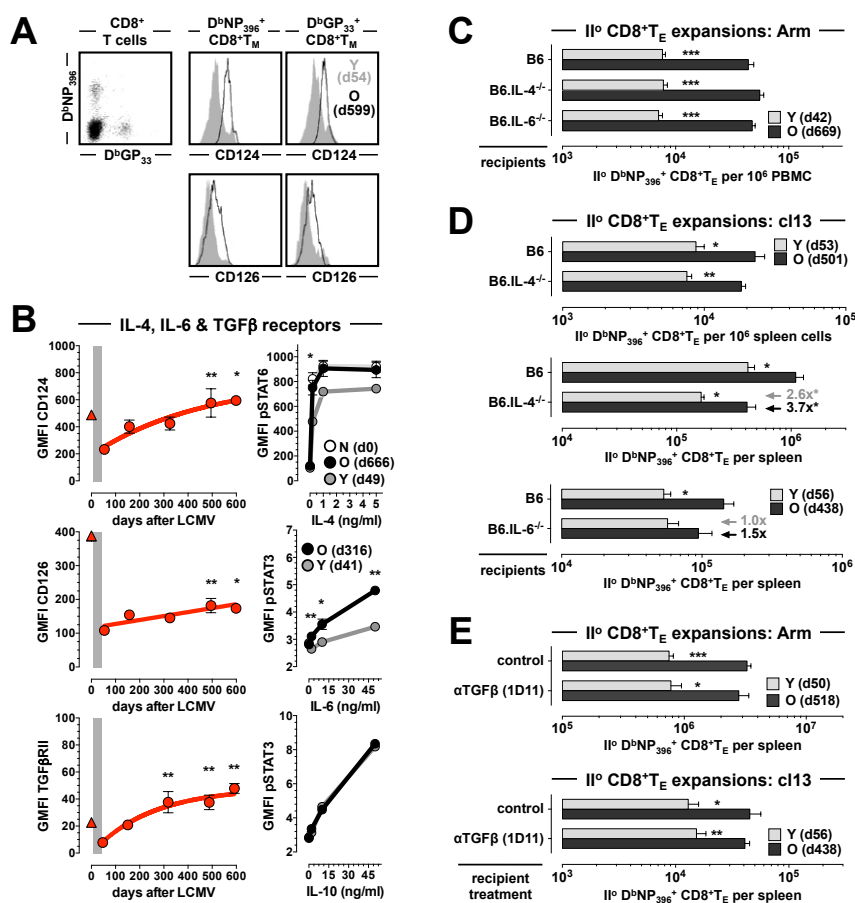

**Figure 3**

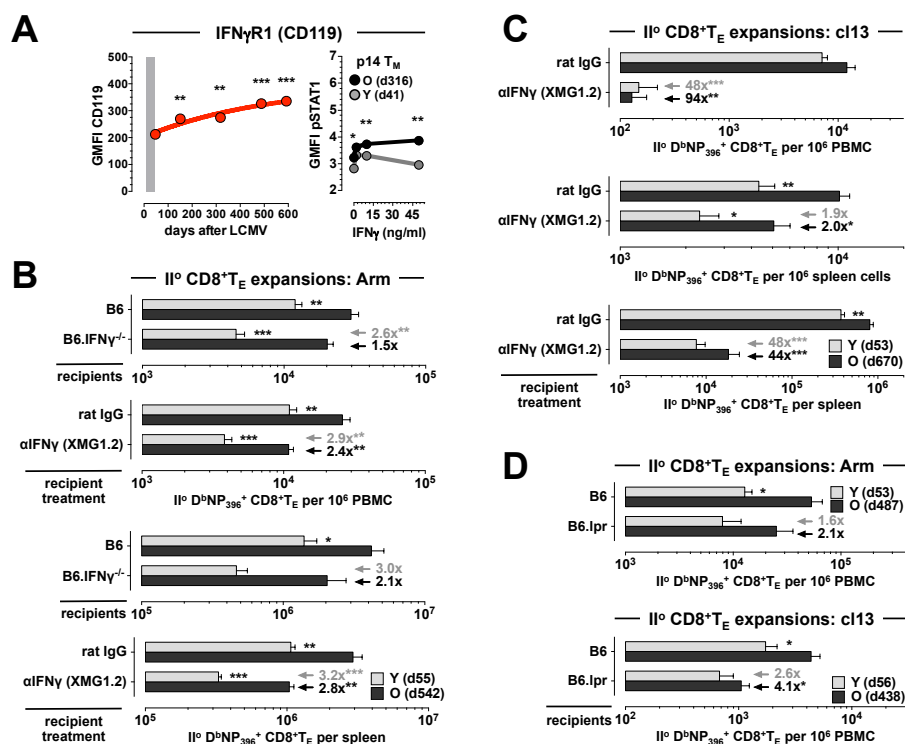

**Figure 4**

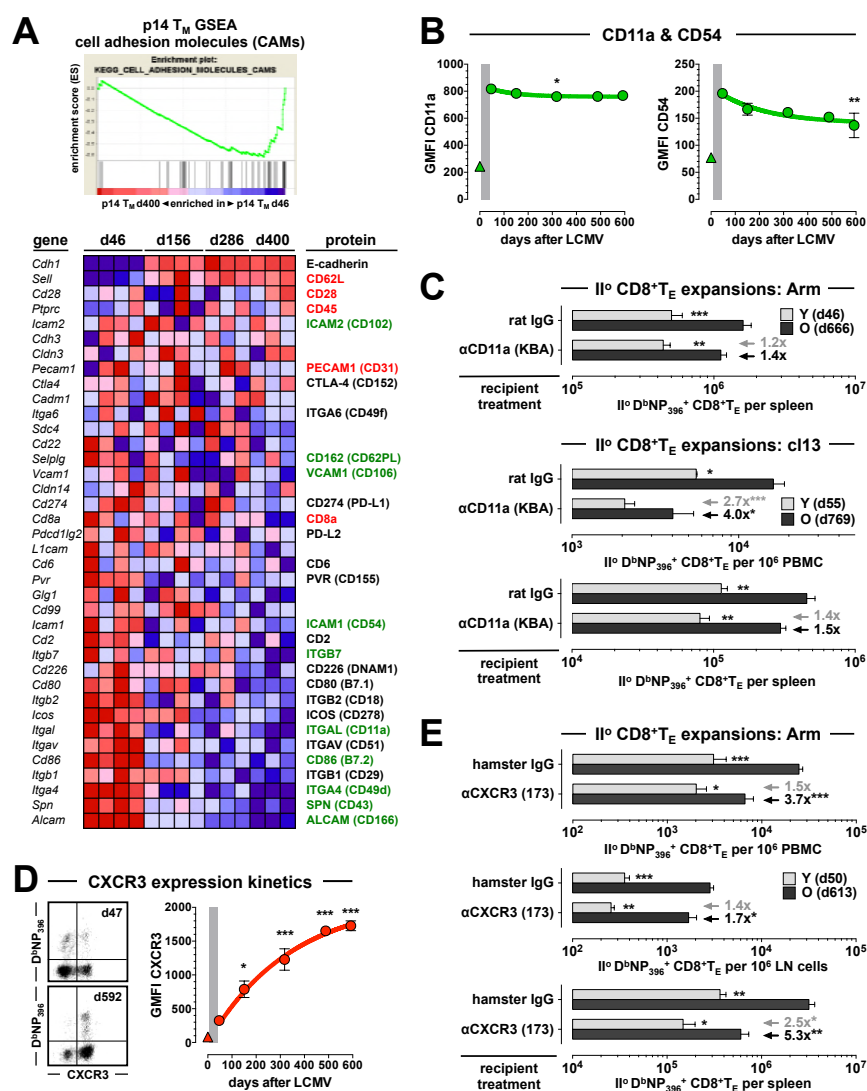

**Figure 5**

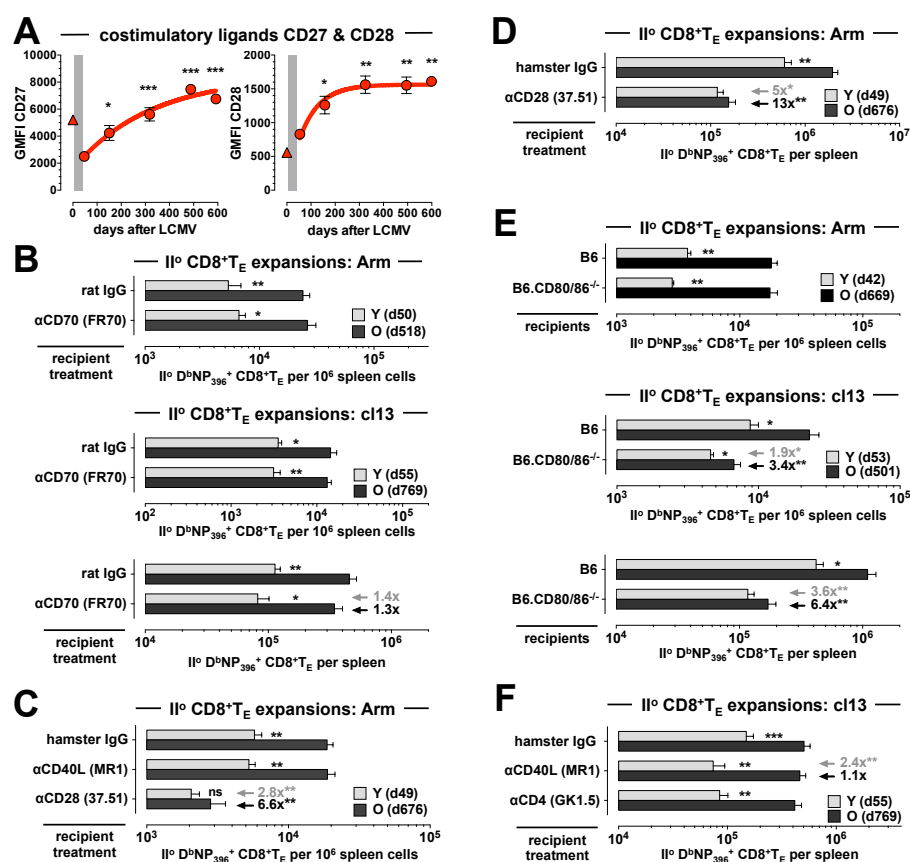

Figure 6

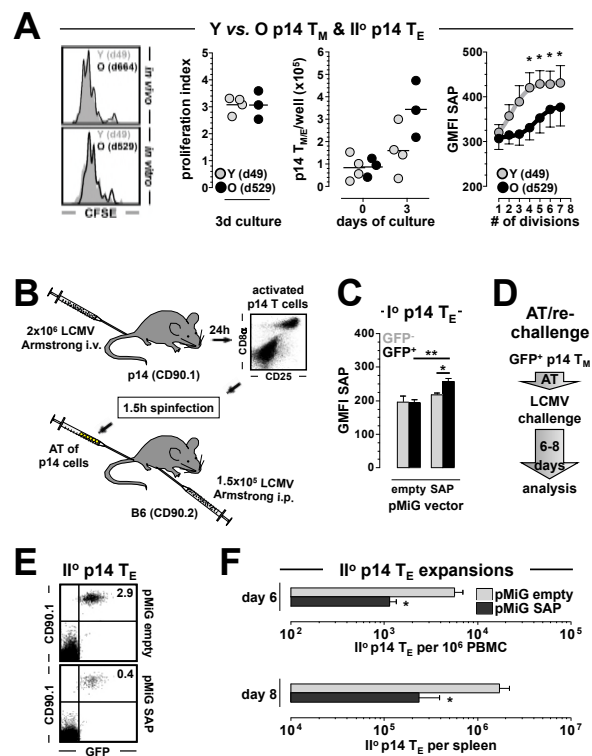

Figure S1

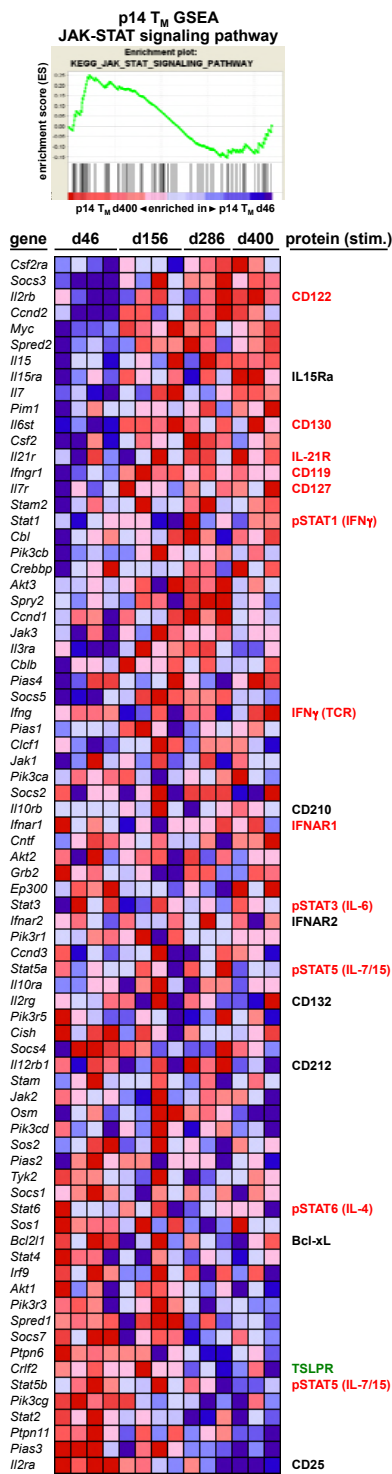

Figure S2

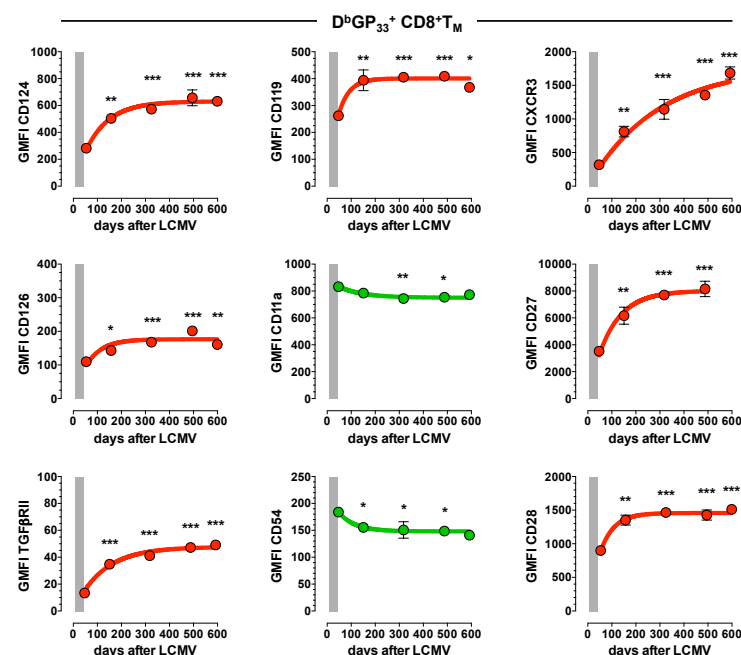

Source: https://www.biorxiv.org/content/10.1101/450072v1.full.pdf
